1 **Distinctive Gene and Protein Characteristics of Extremely Piezophilic *Colwellia***

2

3 Logan M. Peoples<sup>1</sup>, Than S. Kyaw<sup>1</sup>, Juan A. Ugalde<sup>2</sup>, Kelli K. Mullane<sup>1</sup>, Roger A. Chastain<sup>1</sup>, A.

4 Aristides Yayanos<sup>1</sup>, Masataka Kusube<sup>3</sup>, Barbara A. Methé<sup>4</sup>, Douglas H. Bartlett<sup>1\*</sup>

5

6 1. Marine Biology Research Division, Scripps Institution of Oceanography, University of

7 California San Diego, La Jolla, CA, 92093-0202

8 2. Centro de Genómica y Bioinformática, Facultad de Ciencias, Universidad Mayor,

9 Santiago, Chile

10 3. Department of Material Science, National Institute of Technology, Wakayama College,

11 77 Noshima, Nada-cho, Gobo, Wakayama 644-0023, Japan

12 4. Center for Microbiome and Medicine, University of Pittsburgh, Pittsburgh, PA, 15213

13

14 \* To whom correspondence should be addressed: [dbartlett@ucsd.edu](mailto:dbartlett@ucsd.edu)

15

16

17

18

19

20

21

22

23 **Keywords:** Piezophile, *Colwellia*, deep sea, hadal, trench, hydrostatic pressure, genomic island

## 24 **Background**

25 The deep ocean is characterized by low temperatures, high hydrostatic pressures, and low  
26 concentrations of organic matter. While these conditions likely select for distinct genomic  
27 characteristics within prokaryotes, the attributes facilitating adaptation to the deep ocean are  
28 relatively unexplored. In this study, we compared the genomes of seven strains within the genus  
29 *Colwellia*, including some of the most piezophilic microbes known, to identify genomic features  
30 that enable life in the deep sea.

31

## 32 **Results**

33 Significant differences were found to exist between piezophilic and non-piezophilic strains of  
34 *Colwellia*. Piezophilic *Colwellia* have a more basic and hydrophobic proteome. The piezophilic  
35 abyssal and hadal isolates have more genes involved in replication/recombination/repair, cell  
36 wall/membrane biogenesis, and cell motility. The characteristics of respiration, pilus generation,  
37 and membrane fluidity adjustment vary between the strains, with operons for a *nuo*  
38 dehydrogenase and a *tad* pilus only present in the piezophiles. In contrast, the piezosensitive  
39 members are unique in having the capacity for dissimilatory nitrite and TMAO reduction. A  
40 number of genes exist only within deep-sea adapted species, such as those encoding d-alanine-d-  
41 alanine ligase for peptidoglycan formation, alanine dehydrogenase for NADH/NAD<sup>+</sup>  
42 homeostasis, and archaeal methyltransferase for tRNA modification. Many of these piezophile-  
43 specific genes are in variable regions of the genome near genomic islands, transposases, and  
44 toxin-antitoxin systems.

45

## 46 **Conclusions**

47 We identified a number of adaptations that may facilitate deep-sea radiation in members of the  
48 genus *Colwellia*, as well as in other piezophilic bacteria. An enrichment in more basic and  
49 hydrophobic amino acids could help piezophiles stabilize and limit water intrusion into proteins  
50 as a result of high pressure. Variations in genes associated with the membrane, including those  
51 involved in unsaturated fatty acid production and respiration, indicate that membrane-based  
52 adaptations are critical for coping with high pressure. The presence of many piezophile-specific  
53 genes near genomic islands highlights that adaptation to the deep ocean may be facilitated by  
54 horizontal gene transfer through transposases or other mobile elements. Some of these genes are  
55 amenable to further study in genetically tractable piezophilic and piezotolerant deep-sea  
56 microorganisms.

57

58

59

60

61

62

63

64

65

66

67

68

69

## 70 **Background**

71           The deep biosphere makes up one of the largest biomes on earth. An inherent  
72 environmental parameter present throughout deep-oceanic and subsurface habitats is high  
73 hydrostatic pressure. Elevated hydrostatic pressure influences many aspects of biochemistry and  
74 requires adaptations throughout the cell (e.g. Somero, 1992). One well-studied adaptation is the  
75 incorporation of unsaturated fatty acids into the membrane to combat physical changes such as  
76 decreased fluidity (e.g. DeLong & Yayanos, 1985; DeLong & Yayanos, 1986; Allen *et al.*,  
77 1999). Additional membrane-associated adaptations are linked to porin-mediated nutrient  
78 transport (Bartlett *et al.*, 1989; Bartlett & Chi 1994), respiration (e.g. Yamada *et al.*, 2000; Vezzi  
79 *et al.*, 2005; Xiong *et al.*, 2016), and flagellar function (Eloe *et al.*, 2008). Within the cell  
80 changes in DNA replication, DNA structure, protein synthesis, and compatible solutes are also  
81 important (El-Hajj *et al.*, 2009; Martin *et al.*, 2002; Lauro *et al.*, 2008; Yancey *et al.*, 2014).  
82 Pressure-induced changes in transcription implicate additional functions (e.g. Campanaro *et al.*,  
83 2012; Michoud & Jebbar, 2016). Despite the fact that pressure exerts a profound influence on the  
84 nature of life at depth, it is largely ignored in studies of deep-ocean biomes, and in marked  
85 contrast to microbial adaptation to temperature or salinity, a robust description of biochemical  
86 adaptation to high pressure is lacking.

87           Only a modest number of psychrophilic (cold-loving) and piezophilic (high-pressure  
88 loving) species have been isolated to date, in large part due to the constraints imposed by  
89 culturing under under *in situ*, high hydrostatic pressure conditions. However, metagenomic  
90 sequencing of deep-ocean communities, and additional analyses of individual microbial  
91 genomes, have provided insights. Metagenomic investigations have included locations within the  
92 North Pacific subtropical gyre, the Mediterranean and the Puerto Rico Trench (DeLong *et al.*,

93 2006; Martin-Cuadrado *et al.*, 2007; Konstantinidis *et al.*, 2009; Eloe *et al.*, 2011; Smedile *et al.*,  
94 2013). Genomic studies include those on *Pseudoalteromonas* (Qin *et al.*, 2011), *Alteromonas*  
95 (Ivars-Martinez *et al.*, 2008), *Shewanella* (Wang *et al.*, 2008; Aono *et al.*, 2010), *Photobacterium*  
96 (Campanaro *et al.*, 2005; Vezzi *et al.*, 2005; Lauro *et al.*, 2014), SAR11 (Thrash *et al.*, 2014),  
97 and members of the *Thaumarchaeota* (Luo *et al.*, 2014; Swan *et al.*, 2014). One picture that has  
98 emerged from the examinations at this level is that deep-sea microbes are enriched in mobile  
99 elements, such as phage and transposases (DeLong *et al.*, 2006; Ivars-Martinez *et al.*, 2008; Eloe  
100 *et al.*, 2011; Qin *et al.*, 2011; Lauro *et al.*, 2013; Smedile *et al.*, 2013; Léon-Zayas *et al.*, 2015).  
101 This has been attributed to the relaxation of purifying selection as an adaptive mechanism  
102 (Konstantinidis *et al.*, 2009), either to deep-ocean conditions or to the conditions found on  
103 particles (Ganesh *et al.*, 2014). Additional properties include an enrichment in heavy metal  
104 resistance genes (Ivars-Martinez *et al.*, 2008; Eloe *et al.*, 2011; Qin *et al.*, 2011; Smedile *et al.*,  
105 2013; Fontanez *et al.*, 2015), the ability to use persistent dissolved organic material under  
106 oligotrophic conditions (e.g. Martin-Cuadrado *et al.*, 2007; Ivars-Martinez *et al.*, 2008; Arrieta *et*  
107 *al.*, 2015; Landry *et al.*, 2017), and widespread ability for chemoautotrophy (Swan *et al.*, 2011;  
108 Swan *et al.*, 2014; Dykstra *et al.*, 2016; Mußmann *et al.*, 2017; Pachiadaki *et al.*, 2017). The  
109 small number of genome sequences of experimentally-confirmed deep-ocean piezophiles include  
110 hyperthermophilic archaea (*Pyrococcus* and *Thermoccus*; Vannier *et al.*, 2011; Jun *et al.*, 2015;  
111 Dalmaso *et al.*, 2016), a thermophilic bacterium (*Marinitoga*; Lucas *et al.*, 2012), a mesophilic  
112 bacterium (*Desulfovibrio*; Pradel *et al.*, 2013) and psychrophilic bacteria (*Photobacterium*,  
113 *Psychromonas*, and *Shewanella*; Vezzi *et al.*, 2005; Aono *et al.*, 2010; Lauro *et al.*, 2013a; Lauro  
114 *et al.*, 2013b; Zhang *et al.*, 2019b). The genomic adaptations of these microorganisms to the deep  
115 ocean or high hydrostatic pressure have not been fully explored (e.g. reviewed in Simonato *et al.*,

116 2006; Lauro *et al.*, 2008; Oger & Jebbar, 2010; Peoples & Bartlett, 2017). Thus far the genome  
117 characteristics of only one experimentally-confirmed obligately psychropiezophilic bacterial  
118 species, *Shewanella benthica* (Lauro *et al.*, 2013a; Zhang *et al.*, 2019b), and one species of  
119 obligately thermopiezophilic archaeon, *Pyrococcus yayanosii* (Jun *et al.*, 2011), have been  
120 described.

121 Most known psychropiezophilic strains belong to phylogenetically narrow lineages of  
122 *Gammaproteobacteria*, including members of the *Colwellia*, *Shewanella*, *Moritella*,  
123 *Photobacterium*, and *Psychromonas* (reviewed in Jebbar *et al.*, 2015; Nogi *et al.*, 2017). The  
124 genus *Colwellia* contains some of the most psychrophilic and piezophilic species currently  
125 known. Members of this genus are heterotrophic and facultatively anaerobic (Bowman *et al.*,  
126 2014). This genus has been of recent interest because of its association with the Deepwater  
127 Horizon oil spill, where members of the *Colwellia* became some of the most abundant taxa  
128 present because of their ability to degrade hydrocarbons (Redmond & Valentine, 2012; Mason *et*  
129 *al.*, 2014; Kleindienst *et al.*, 2015). Although *Colwellia* do not appear to be abundant members of  
130 deep-ocean or hadal (typically < 1% ; e.g. Eloë *et al.*, 2011; Tarn *et al.*, 2016; Peoples *et al.*,  
131 2018) communities, they can become dominant members under mesocosm conditions  
132 (Hoffmann *et al.*, 2017; Boeuf *et al.*, 2019; Peoples *et al.*, 2019a). At least four piezophiles have  
133 been successfully isolated and described from this genus. The first known obligate  
134 psychropiezophile, originally designated *Colwellia* sp. MT41, was isolated from the amphipod  
135 *Hirondellea gigas* from the Mariana Trench at a depth of 10,476 m (Yayanos *et al.*, 1981). Strain  
136 MT41 shows optimum growth at 103 MPa and does not grow at a pressure below 35 MPa,  
137 approximately the pressure at average ocean depths (Yayanos *et al.*, 1981; Yayanos, 1986;  
138 DeLong *et al.*, 1997). Recently, *Colwellia marinimaniae* MTCD1, the most piezophilic microbe

139 known to date, was isolated from an amphipod from the Mariana Trench (Kusube *et al.*, 2017).  
140 This strain displays an optimum growth pressure of 120 MPa and a growth range from 80 to 140  
141 MPa, higher than the pressure found at full ocean depth. Based on 16S rRNA gene similarity  
142 both strains MT41 and MTCD1 strains were determined to belong to the species *Colwellia*  
143 *marinimaniae* (Kusube *et al.*, 2017). Other psychropiezophiles within the genus include *C.*  
144 *hadaliensis* (Deming *et al.*, 1988) and *C. piezophila* (Nogi *et al.*, 2004), isolated from the Puerto  
145 Rico and Japan trenches, respectively. While the growth characteristics and fatty acid profiles of  
146 these piezophilic species of *Colwellia* have been reported, other adaptations of these strains for  
147 dealing with high hydrostatic pressure and deep-ocean environmental conditions have not been  
148 investigated in great detail.

149 In this study, we compared the genomes of members of the *Colwellia* to identify  
150 attributes that confer adaptation to the deep ocean. We report the genome sequences of three  
151 obligately piezophilic *Colwellia*; *Colwellia marinimaniae* MT41, *C. marinimaniae* MTCD1, and  
152 a new isolate obtained from sediment in the Tonga Trench, *Colwellia* sp. TT2012. We compared  
153 these genomes, along with the publicly-available genome of *C. piezophila* ATCC BAA-637  
154 (isolated as strain Y223G; Nogi *et al.*, 2004), against three piezosensitive strains of *C.*  
155 *psychrerythraea*. The piezosensitive strains include the most well-studied member of the  
156 *Colwellia*, *C. psychrerythraea* 34H, a psychrophile isolated from Arctic ocean sediments  
157 (Huston *et al.*, 2000) whose adaptations to low temperature have been investigated at multiple  
158 levels (e.g. Marx *et al.*, 2009; Showalter & Deming, 2018), including with genomics (Methé *et*  
159 *al.*, 2005). The two other comparison strains are *C. psychrerythraea* GAB14E and ND2E,  
160 obtained from the Great Australian Bight at a depth of 1472 m and the Mediterranean Sea from  
161 495 m, respectively (Figure 1A; Techtmann *et al.*, 2016). While the *C. psychrerythraea* strains

162 share 99% identical 16S rRNA sequences, they have very divergent average nucleotide identities  
163 (ANI; Techtmann *et al.*, 2016). Because low temperatures and high pressures have similar effects  
164 on biochemical processes, these three microbes were selected as comparison strains because they  
165 all show growth at low temperatures, reducing the impact of temperature as a confounding  
166 factor. Through the comparison of these seven strains depth and pressure-associated shifts were  
167 identified in protein amino acid distributions and isoelectric points, as well as in gene  
168 abundances, including the discovery of piezophile-specific genes.

169

## 170 **Results**

### 171 *General characteristics*

172 We first evaluated the influence of high hydrostatic pressure on the growth of the seven  
173 strains of *Colwellia*. The growth characteristics of *Colwellia marinimaniae* MT41, *C.*  
174 *marinimaniae* MTCD1, and *C. piezophila* have been previously reported, showing growth  
175 optima at 103 MPa (Yayanos, 1986; DeLong *et al.*, 1997), 120 MPa (Kusube *et al.*, 2017), and  
176 60 MPa (Nogi *et al.*, 2004), respectively. *Colwellia* sp. TT2012 is obligately piezophilic,  
177 showing growth at 84 and 96 MPa but not at atmospheric pressure. We report the optimum  
178 growth pressure in this manuscript as 84 MPa because strain TT2012 was not able to be revived  
179 after repeated cryopreservation for growth rate analyses at lower or higher pressures. The three  
180 *C. psychrerythraea* strains displayed different growth patterns from one another, but similarly  
181 showed no growth at a pressure of 40 MPa after 10 days regardless of temperature (4°C or 16°C;  
182 Supplementary Figure 1). Based on these growth characteristics, we classified the microbes as  
183 either piezophilic (*C. marinimaniae* MT41, *C. marinimaniae* MTCD1, *Colwellia* sp. TT2012,



184 and *C. piezophila*) or piezosensitive (*C. psychrerythraea* strains 34H, GAB14E, and ND2E).

185 These terms are used to describe these groupings for the remainder of the manuscript.

186 To identify genomic attributes that facilitate growth at high pressure in the deep sea, we  
187 compared the genomes of the piezophilic and piezosensitive strains (Table 1). We report here for  
188 the first time the genome sequences of *Colwellia marinimaniae* MT41, *C. marinimaniae*  
189 MTCD1, and *Colwellia* sp. TT2012. The remaining genomes are either publicly available (*C.*  
190 *piezophila*, Kyrpides *et al.*, 2014) or have been previously reported (strain 34H, Methé *et al.*,  
191 2005; strains ND2E and GAB14E, Techtmann *et al.*, 2016). The piezophiles are more closely  
192 related to one another than to the piezosensitive strains based on a whole genome marker tree  
193 and average nucleotide identity (Figure 1). This is also true when the strains are compared using  
194 a ribosomal 16S rRNA gene phylogenetic tree (Supplementary Figure 2). *Colwellia marinimaniae*  
195 MT41, *C. marinimaniae* MTCD1, and *Colwellia* sp. TT2012 share approximately 96% 16S  
196 rRNA gene sequence similarity and formed a monophyletic clade with an isolate from the  
197 Kermadec Trench. Despite being isolated 34 years apart, strains MT41 and MTCD1 share  
198 greater than 99% 16S rRNA gene sequence similarity and ANI. In contrast, the ANI of these  
199 strains are only 95% similar to TT2012, indicating that TT2012 represents a distinct species. *C.*  
200 *piezophila* does not appear to belong to this 16S rRNA gene tree piezophile-only monophyletic  
201 clade (Supplementary Figure 2), although this relationship could not be confirmed with a whole  
202 genome marker tree due to a lack of related genomes. Despite showing greater than 98% 16S  
203 rRNA gene sequence similarity, the ANI of *C. psychrerythraea* strains 34H, GAB14E, and  
204 ND2E is less than 90%, indicating that they have highly variable genome sequences.

205

206 *GC content and amino acid features*

207 We first compared general genomic attributes of the piezophilic and piezosensitive  
208 strains, including genome size, GC content, isoelectric point, and amino acid distribution.  
209 Genome sizes ranged between 4.3 and 5.7 Mbp in size (Table 1). The three piezophiles isolated  
210 from the deepest depths (strains MT41, MTCD1, TT2012) have smaller genomes than the  
211 piezosensitive strains (T-test,  $p < .031$ ), but no correlation between genome size and optimum  
212 growth pressure was found when considering *C. piezophila* and other members of the *Colwellia*  
213 (Supplementary Figure 3). Coding density is lower in the piezophilic *Colwellia*. This is true even  
214 when including all sequenced members of the *Colwellia* (T-test,  $p < .01$ ). GC content ranged  
215 between ~ 38 and 39%, with slightly higher GC present in the piezophiles. This is also true when  
216 compared with other *Colwellia* strains with the exception of *C. chukchiensis* (Supplementary  
217 Figure 3; T-test,  $p < .08$ ). However, when examining members of the genera *Colwellia*,  
218 *Psychromonas*, and *Shewanella*, no correlation was apparent between % GC and growth  
219 pressure. No correlation was found between optimum growth pressure and % GC within full  
220 length 16S rRNA genes in the *Colwellia*.

221 Next, we evaluated the isoelectric point distributions of the *Colwellia*. Both piezophilic  
222 and piezosensitive strains show a similar bimodal distribution of protein isoelectric points.  
223 However, the piezophiles have a higher number of basic proteins (Figure 2; T-test,  $p < .01$ ). This  
224 shift is also seen when comparing within a broader number of *Colwellia* (T-test,  $p < .01$ ) with the  
225 exception of *C. chukchiensis* (Supplementary Figure 4). Piezophilic strains within the genera  
226 *Psychromonas* and *Shewanella* also show a higher number of basic proteins compared to their  
227 piezosensitive counterparts (Supplementary Figure 4; T-test, *Psychromonas*,  $p < .03$ ; T-test,  
228 *Shewanella*, clade 3,  $p < .34$ ), with obligate piezophiles such as *Shewanella benthica* KT99,  
229 *Psychromonas* sp. CNPT3, and an uncultured *Psychromonas* single-amplified genome from a

230 hadal amphipod (Leon-Zayas *et al.*, 2015) having dramatically more basic proteins. GC content  
231 or optimum growth temperature does not appear to be responsible for this shift in pI bias, even  
232 when taking into account within-genus phylogenetic clades (Supplementary Figure 4,  
233 Supplementary Figure 5).

234 Comparisons of amino acid abundances within conserved, orthologous proteins showed  
235 that certain amino acids are more abundant in the piezophilic proteins when compared to those in  
236 *C. psychrerythraea* 34H (Figure 2). Amino acids that are specifically enriched in the piezophiles  
237 included tryptophan (W), tyrosine (Y), leucine (L), phenylalanine (F), histidine (H), and  
238 methionine (M). In contrast, amino acids enriched in the piezosensitive strain included glutamic  
239 acid (E), aspartic acid (D), asparagine (N), and serine (S). Specific amino acid asymmetrical  
240 substitutions in which one amino acid consistently replaced another, including substitutions that  
241 were also conserved in comparisons within members of the *Shewanella*, from piezosensitive to  
242 piezophilic amino acid were: glutamic acid → alanine (A), proline (P) → alanine, threonine (T)  
243 → isoleucine (I), valine (V) → isoleucine (I), glutamic acid → lysine (K), asparagine (N) →  
244 lysine, glutamic acid → glutamine (Q; Figure 2). Further asymmetrical substitutions specific to  
245 the genus *Colwellia* include, from non-piezophile to piezophile, aspartic acid → alanine, glycine  
246 (G) → alanine, serine → alanine, asparagine → histidine, valine → leucine, and glutamic acid →  
247 threonine.

248

#### 249 *Gene differences*

250 We compared the predicted gene complements of the piezophilic and piezosensitive  
251 strains. When comparing relative abundances of clusters of orthologous genes (COGs; Figure 3),  
252 piezophilic *Colwellia* have a higher percentage of genes for replication/recombination/repair

253 (Category L), cell wall/membrane biogenesis (Category M), cell motility (Category N),  
254 extracellular structures (Category W), and translation and ribosomal structure (Category J). The  
255 piezosensitive strains have higher percentages of genes for transcription (Category K), secondary  
256 metabolite biosynthesis/transport/metabolism (Category Q), and general function prediction  
257 (Category R). Transposable elements are notably more abundant in the piezophiles, with the  
258 exception of *C. piezophila*, having almost twice as many transposases as their piezosensitive  
259 counterparts (Figure 3). Toxin-antitoxin genes are also enriched in the piezophiles, with  
260 piezophilic strains containing 24-33 toxin-antitoxin genes while the piezosensitive *Colwellia*  
261 have 9-18 copies. We found that strain MT41 and *C. psychrerythraea* 34H have approximately  
262 11 and 9 genomic islands (GIs), respectively, as determined using Island Viewer (Bertelli *et al.*,  
263 2017). We do not report the total number of GIs in the other strains because the fragmentation of  
264 their genomes likely leads to GI misidentification.

265 All of the strains analyzed are heterotrophic. However, potential differences in carbon  
266 metabolism exist (Figure 3). Genes for sarcosine oxidase (*soxBDAG*), which function in the  
267 catabolism of glycine betaine in *Colwellia* (Collins & Deming, 2013), are present in 34H and  
268 ND2E but not in the piezophiles. Transporters and permeases for putrescine are enriched in 34H  
269 and GAB14E, strains where putrescine has been experimentally shown to be used as a sole  
270 carbon source (Techtmann *et al.*, 2016). In contrast, we identified genes involved in chitin  
271 degradation, such as a chitin binding protein and chitinase (family 10 and 18), in the piezophiles  
272 and GAB14E but not in the other piezosensitive strains.

273 Members of the *Colwellia* are facultative anaerobes capable of respiration and  
274 fermentation. While all the *Colwellia* compared here use both the rnf (*rnfABCDGE*) and Na<sup>+</sup>-nqr  
275 (*nqrABCDEF*) respiratory complexes, the NADH dehydrogenase I complex

276 (*nuoABCEFGHIJKLMN*) is only present in the three hadal piezophiles. These genes show  
277 similarity to those in the piezophiles *Shewanella benthica* and *S. violacea* and to metagenomic  
278 sequences from hadal sediments (Peoples, 2018). While all seven strains may have the capacity  
279 for assimilatory nitrite (such as *nirBD*, *nasA*) and nitrate reduction (*napCBADFE*), genes for  
280 dissimilatory nitrite reduction (*nirSCFNTB*) are only present in *C. psychrerythraea* strains 34H  
281 and ND2E. The gene *nirK* is present in *C. piezophila*, although this strain was shown to reduce  
282 nitrate but not nitrite (Nogi *et al.*, 2004). The gene cluster for nitrous oxide reduction,  
283 *nosRZDFYL*, is present in strains 34H, ND2E, and *C. piezophila*. This operon is flanked by  
284 conserved regions found in the other strains, suggesting an insertion or deletion event.  
285 Furthermore, the capacity for trimethylamine-N-oxide reduction using *torSTRECAD* is present in  
286 strains 34H and ND2E but not in any of the piezophiles.

287         The seven strains of *Colwellia* compared are psychrophilic or psychrotolerant and have  
288 adaptations to low temperatures. For example, all contain *pfaABCD* to produce polyunsaturated  
289 fatty acids to counteract decreases in membrane fluidity because of low temperatures. In the case  
290 of the deep-sea *Colwellia* this system will also optimize membrane phospholipid physical state at  
291 high pressure. However, a number of genes involved in membrane adaptation are differentially  
292 present among the two *Colwellia* groups. All piezophilic *Colwellia* have genes encoding delta-9  
293 acyl-phospholipid desaturase, another enzyme promoting unsaturated fatty acid synthesis by  
294 introducing double bonds directly into membrane phospholipid saturated fatty acids. In contrast,  
295 a fatty acid cis/trans isomerase that alters the ratio of cis- and trans- phospholipids by  
296 isomerizing -cis to -trans double bonds, is encoded within all piezosensitive *Colwellia* but is  
297 notably absent in the piezophilic *Colwellia*. Furthermore, the piezophilic strains encode almost  
298 twice as many glycosyltransferases, enzymes involved in extracellular polysaccharide synthesis.

299           Stress-response genes are also differentially present in the genomes.  
300    Deoxyribopyrimidine photolyase (DNA photolyase; *phrB*), which is involved in repairing DNA  
301    damaged by ultraviolet light, is found in strains 34H and ND2E but notably absent in all  
302    piezophilic *Colwellia*. Both piezophilic and piezosensitive strains contain superoxide dismutase  
303    and catalase for responding to oxidative stress. The genes *araC* and *lysR*, whose products control  
304    the expression of a variety of stress response systems, are more abundant in the piezosensitive  
305    *Colwellia*. The piezophilic *Colwellia* are distinct in having multicopper oxidases and copper  
306    chaperones for coping with heavy metal damage and maintaining copper homeostasis.  
307    Phenotypic analysis of the *Colwellia* showed that the piezophiles appear more resistant to copper  
308    exposure compared to their non-piezophilic counterparts (Supplementary Figure 6). Some of the  
309    genes which putatively confer heavy metal resistance are similar to other piezophiles and are  
310    located near genomic islands or other horizontally transferred elements, consistent with the  
311    hypothesis that heavy metal genes can be horizontally transferred (e.g. Orellana & Jerez, 2011;  
312    Navarro *et al.*, 2013; Chen *et al.*, 2017).

313           We identified other unique genes that differ not only between *Colwellia* strains but show  
314    biased distributions towards additional piezophilic microbes and deep-ocean metagenomic  
315    datasets (Table 2; Dombrowski *et al.*, 2018; Hu *et al.* 2018; Tully *et al.*, 2018; Peoples, 2018).  
316    For example, a putative archaeal S-adenosyl-l-methionine (SAM) dependent methyltransferase  
317    (pfam13659) is present in the piezophiles and strain GAB14E. This protein is similar to those  
318    present in bacterial and archaeal piezophiles, including members of the genera *Colwellia*,  
319    *Shewanella*, *Moritella*, *Psychromonas*, *Methanocaldococcus*, *Thermococcus*, and *Pyrococcus*.  
320    The related methyltransferase isolated from *Pyrococcus abyssi* (39% similar to MT41 protein)  
321    functions in tRNA modification (Guelorget *et al.*, 2010). Piezophilic *Colwellia* have two copies

322 of d-alanine-d-alanine ligase (pfam07478), a gene which may be involved in peptidoglycan  
323 synthesis. Unlike the situation in piezophilic *Shewanella* (Zhang *et al.*, 2019b), this gene is not  
324 present near flagellar assembly components. While all strains have operons for a Type II  
325 secretion system and a Type IV pilus, a *tad* pilus involved in adhesion is found only in the  
326 piezophiles and related to that in *Shewanella violacea*. This operon is also found in GAB14E;  
327 however, this strain lacks a number of putative *tadE*-like genes that are present in the piezophile  
328 operons. Two alanine dehydrogenases are also present in the piezophilic strains while only one is  
329 present in the piezosensitive members. The piezophile-specific dehydrogenase (pfam05222) is  
330 thought to catalyze the NAD-dependent reversible amination of pyruvate to alanine. It is similar  
331 to a dehydrogenase present in other piezophilic species, including *Shewanella benthica*,  
332 *Moritella yayanosii*, *Photobacterium profundum* SS9, and binned genomes from a deep subsea  
333 aquifer (Tully *et al.*, 2018) and trench sediments (Peoples, 2018).

334 A number of the genes specific to piezophiles are present near one another, rather than  
335 individually spread throughout the genome (Table 2). Many of these genes are near variable  
336 regions containing genomic islands, phage genes, transposases, and toxin-antitoxin system genes  
337 (Supplementary Figure 7). For example, the d-alanine-d-alanine ligase in strain MT41 is next to  
338 two putative genomic island regions, one of which is different than that present in strain TT2012  
339 (Figure 4). Because genomic islands are identified based on nucleotide bias across the genome  
340 and the *Colwellia* sp. TT2012 genome is fragmented into short contigs, the lack of predicted  
341 genomic islands does not preclude their presence. In the piezophile *Moritella yayanosii* this gene  
342 is near a gene encoding a predicted phage integrase protein, while in *Shewanella benthica* KT99  
343 it is present in a flagellar operon that also contains a transposase embedded within it. Similarly,  
344 the piezophile-specific alanine dehydrogenase is present near a number of phage and

345 toxin/antitoxin genes and downstream from a genomic island. In strain TT2012, this gene is in  
346 the middle of a putative genomic island (Figure 5), while in *Photobacterium profundum* SS9 it is  
347 flanked on one side by a transposase. Some of the genes present in these variable regions, when  
348 not specific to piezophiles, display low similarity to members of the genus *Vibrio*. The similarity  
349 of variable genes within *Colwellia* to species of *Vibrio* has been previously noted (Collins &  
350 Deming, 2013). Horizontal gene transfer has been shown to be important in the evolution of  
351 *Vibrio* species (Faruque & Mekalanos, 2013).

352

### 353 **Discussion**

354 In this study we compared the genomes of members of piezophilic *Colwellia* – including  
355 the most high pressure-adapted species known to date – with their piezosensitive counterparts to  
356 search for features that could confer adaptation to the deep sea. These microbes were isolated  
357 from surface and bathyal waters to abyssal and hadal depths. Both 16S rRNA gene sequence-  
358 based phylogenetic analyses and phylogenomic analyses indicate that the piezophilic *Colwellia*  
359 are closely related. While the piezophiles appear to form a single cluster based on the  
360 phylogenomic tree, in the 16S rRNA gene phylogenetic tree *C. piezophila* appears basal to not  
361 only the piezophiles but also a clade that includes piezosensitive lineages. Therefore, it is  
362 possible that piezophily has evolved multiple times within the *Colwellia*. Further whole genome  
363 sequencing will be needed to determine if all piezophilic *Colwellia* form a single clade  
364 independent from other piezosensitive microbes as has been reported for *Shewanella* (Aono *et*  
365 *al.*, 2010). Piezophilic *Colwellia* have now been isolated from five different trenches, including  
366 the Mariana (strains MT41, MTCD1), Puerto Rico (*C. hadaliensis*), Japan (*C. piezophila*), Tonga  
367 (strain TT2012), and Kermadec (Bartlett laboratory unpublished; Lauro *et al.*, 2007; Peoples *et*



368 *al.*, 2019a). Piezophilic members of the genus *Colwellia* are therefore widespread within deep-  
369 ocean and hadal environments.

370         While the piezophiles have lower coding density than their non-piezophilic counterparts,  
371 no correlation was found between genome size and optimum pressure of growth. This is in  
372 contrast to comparisons between shallow and deep pelagic datasets showing that deeper lineages  
373 appear to have larger genomes (e.g. Konstantinidis *et al.*, 2009; Beszteri *et al.*, 2010; Eloë *et al.*,  
374 2011; Thrash *et al.*, 2014). Instead, the three piezophiles with the deepest collection depths  
375 represented some of the smallest *Colwellia* genomes examined. One possibility is that these  
376 differences reflect different selective pressures operating within seawater, sediments and  
377 amphipods. It is remarkable that strain MT41 and MTCD1, two piezophiles isolated from  
378 amphipod material in the Mariana Trench 34 years apart, share over 99% ANI. Perhaps this  
379 reflects strong selection for a particular *Colwellia* strain within the microbiome of Mariana  
380 Trench *Hirondellea gigas* amphipods, such as that seen within symbionts of deep-sea  
381 anglerfishes (Baker *et al.*, 2019). Their consistent isolation from amphipods (e.g. Yayanos *et al.*,  
382 1981; Kusube *et al.*, 2017) suggests that some members can be associated with hosts, and host-  
383 microbe relationships can lead to genome streamlining and smaller genome sizes (McCutcheon  
384 & Moran, 2012). Nearly all known piezophilic genera have been found in conjunction with hosts  
385 (e.g. Nakayama *et al.*, 2005) and the microbial activity of the gut contents of deep-sea animals  
386 shows high levels of piezophily (Tabor *et al.*, 1982). However, the genus *Colwellia* is not present  
387 in recognizable abundances within hadal amphipod metagenomes (Zhang *et al.*, 2019a), their  
388 high % GC is not indicative of an endosymbiont (McCutcheon & Moran, 2012), and the obligate  
389 piezophile *Colwellia* sp. TT2012 was isolated from sediments rather than amphipods. An  
390 alternative hypothesis is that *Colwellia* may be undergoing genome reduction because of a

391 specialized lifestyle within the deep sea, as hypothesized for some psychrophiles within sea ice  
392 (Feng *et al.*, 2014). Members of this genus may instead be isolated in conjunction with  
393 amphipods because of their ability to degrade nutrient-rich decaying amphipod material, for  
394 example using genes for chitin degradation. *Colwellia* may also be ingested by amphipods as a  
395 byproduct of the feeding of these deep-sea scavenging macrofauna because of the preference of  
396 *Colwellia* for nutrient-rich particulate organic material (Hoffmann *et al.*, 2017; Peoples *et al.*,  
397 2018; Boeuf *et al.*, 2019).

398         The isoelectric point (pI) distribution of proteins within a proteome can correlate with the  
399 ecological niche of an organism (Kiraga *et al.*, 2007). Here we found that piezophilic *Colwellia*  
400 have a more basic proteome than their piezosensitive counterparts. This pattern is conserved in  
401 comparisons between piezophilic and piezosensitive members of the genera *Shewanella* and  
402 *Psychromonas*, indicating it is a property that may be widespread amongst piezophiles within the  
403 *Gammaproteobacteria*. Although intracellular microorganisms also have more basic proteomes  
404 than free-living species (Kiraga *et al.*, 2007), this is associated with an AT base pair enrichment  
405 not present in the piezophilic *Colwellia*. A basic proteome may be the result of the accumulation  
406 of mutations (Kiraga *et al.*, 2007), consistent with the low coding density and high numbers of  
407 transposable elements within the piezophiles. Alternatively it could arise to help with charge  
408 balance within the cytoplasm, analogous to the role of the more acidic proteome of haloarchaea,  
409 which counters the high intracellular potassium ion levels present at high osmotic pressures (Paul  
410 *et al.*, 2008). The intracellular inorganic and organic solute levels within piezophiles are not well  
411 known, but could be important to the maintenance of macromolecule function at high pressure  
412 (Martin *et al.*, 2002; Yancey *et al.*, 2001; Yancey, 2005). Among orthologous proteins  
413 piezophiles are also enriched in hydrophobic residues, including tryptophan, tyrosine, leucine,

414 phenylalanine, histidine, and methionine. This finding has been noted in metagenomes from  
415 4,000 m (Konstantinidis *et al.*, 2009) and may be important in maintaining protein structure  
416 against water penetration at high pressure (Hummer *et al.*, 1998; Somero, 2003). Specific amino  
417 acid substitutions where one amino acid is consistently replaced by another indicate that small  
418 nonpolar compounds (alanine, isoleucine), amine-containing polar compound (glutamine), and a  
419 positively charged basic compound (lysine) are selected for in piezophiles, while negatively  
420 charged acidic compounds (glutamate), polar compounds (threonine, asparagine), and non-polar  
421 compounds (valine, proline) are selected against. Similar shifts were also seen in *Desulfovibrio*  
422 *piezophilus* (Pradel *et al.*, 2013), although different amino acids were preferentially abundant in  
423 piezothermophilic archaea (Di Giulio, 2005).

424 We identified a number of gene abundance characteristics that could confer adaptation to  
425 the deep ocean. Enrichments in COG J (translation), L (replication and repair), M (cell  
426 wall/membrane biogenesis), and N (cell motility) appear enriched in the piezophiles. An  
427 enrichment of category M and L has previously been observed within deep ecotypes of  
428 *Alteromonas* (Ivars-Martinez *et al.*, 2008). The enrichment within the piezophiles of COG M is  
429 in part due to higher abundances of glycosyltransferases, which appear to correlate with depth  
430 within metagenome datasets (DeLong *et al.*, 2006). Glycosyltransferases have been predicted to  
431 contribute to low temperature-adaptation (Méthé *et al.*, 2005) and could be more abundant in the  
432 psychropiezophiles because they are more stenothermic. In contrast, a fatty acid cis/trans  
433 isomerase was present only in the piezosensitive strains. The rapid cis-to-trans isomerization of  
434 unsaturated fatty acids via this isomerase has been observed in *Pseudomonas putida* P8 in  
435 response to changes in temperature and salinity (Loffeld & Keweloh, 1996; Holtwick *et al.*,  
436 1997). Furthermore, the COG category for transcription (K) is significantly enriched in non-

437 piezophiles compared to piezophiles. This is in part due to an enrichment in the transcription  
438 factors *AraC* and *LysR*, which have a wide variety of regulatory functions including carbon  
439 metabolism and stress response (Gallegos *et al.*, 1997; Maddocks & Oyston, 2008). The  
440 enrichment of COG category K in shallow-water organisms has been observed in the surface-  
441 water ecotype of *Alteromonas macleodii* (Ivars-Martinez *et al.*, 2008). These findings could  
442 reflect the adaptation of non-piezophilic shallow-water microbes to a more dynamic  
443 environment, such as rapid salinity or temperature shifts associated with sea-ice or surface  
444 seawater. In contrast, autochthonous, obligate deep-ocean microbes would not be expected to  
445 experience similar rates or magnitudes of these changes.

446         Other specific genes biased towards piezophiles within COG M include delta-9 acyl-  
447 phospholipid desaturase and a CDP-alcohol phosphatidyltransferase. While the desaturase is  
448 upregulated at high pressure in *Photobacterium profundum* SS9 (Campanaro *et al.*, 2005), this  
449 gene is present in other non-piezophilic strains of the *Colwellia* not examined here, indicating it  
450 may not be pressure-specific. An extra copy of d-alanine-d-alanine ligase is present in the  
451 piezophiles and may function in peptidoglycan biosynthesis. While this gene was reported within  
452 a flagellar operon in *Shewanella benthica* (Zhang *et al.*, 2019b), in strain MT41 it is present next  
453 to a putative genomic island (Figure 5). The non-piezophile-specific copy of d-alanine-d-alanine  
454 ligase is upregulated in the proteome of strain 34H after incubation at -1°C (Nunn *et al.*, 2015),  
455 perhaps reflecting a role in low temperature acclimation. Overall, the enrichment in piezophiles  
456 of genes involved in COG category M is consistent with a wealth of experimental evidence  
457 demonstrating that changes in membrane structure are critical for adapting to high hydrostatic  
458 pressure. Unsaturated fatty acids help maintain membrane structure under high pressure (Chi and  
459 Bartlett, 1995; Yano *et al.*, 1998; Allen *et al.*, 1999; Usui *et al.*, 2012; Abe, 2013), with strain

460 MT41 able to produce more than 15% of its total membrane fatty acids as docosahexaenoic acid  
461 (22:6; DeLong & Yayanos, 1986).

462 Another adaptation associated with the membrane involves energetics and respiration.

463 We identified an additional NADH ubiquinone oxidoreductase (*nuo*) gene cluster in a number of  
464 piezophiles. This unique NADH dehydrogenase, which translocates four protons per two  
465 electrons (Pinchuk *et al.*, 2010), may help with energy acquisition under *in situ*, high pressure  
466 conditions. We also identified an alanine dehydrogenase specific to the piezophiles that may  
467 function in the reversible amination of pyruvate to alanine coupled with the oxidation of NADH  
468 to NAD<sup>+</sup>. This may act as an adaptive strategy under inhibited respiratory conditions by  
469 maintaining NADH/NAD<sup>+</sup> homeostasis (Jeong & Oh, 2019), such as during shifts to anoxic  
470 conditions (Hutter & Dick, 1998; Feng *et al.*, 2002) or after exposure to physical stressors  
471 impeding electron flow. Alanine dehydrogenases in *Listeria* are insensitive to inactivation up to  
472 pressures of 550 MPa (Simpson & Gilmour, 1997), transcriptionally upregulated in  
473 *Desulfovibrio piezophilus* at high pressure (Pradel *et al.*, 2013), and abundant in the proteomes of  
474 strain 34H at sub-zero temperatures (Nunn *et al.*, 2015). We speculate that the piezophilic  
475 alanine dehydrogenase functions in NADH/NAD<sup>+</sup> homeostasis under high hydrostatic pressure  
476 conditions. In contrast, we found that TMAO reductase (*torECAD*), which reduces TMAO to  
477 TMA, was not present in any of the piezophilic *Colwellia*. A similar finding has been noted in  
478 genomes of *Psychromonas* from the guts of hadal amphipods, where the lack of TMAO  
479 reductase was attributed to the preferential need for TMAO as a piezolyte in the host amphipod  
480 over its use as an electron acceptor by the microbe (Zhang *et al.*, 2018). An alternative  
481 hypothesis is that TMAO is used by microbial piezophiles as a piezolyte as it is in deep-sea  
482 metazoans (Yancey *et al.*, 2001; Yancey *et al.*, 2014). Finding differences in respiratory

483 capacity within piezophiles is not unexpected. Others have previously noted the influence of  
484 collection depth and pressure on the presence and regulation of respiratory membrane-bound  
485 cytochrome c oxidases and hydrogenases (Yamada *et al.*, 2000; Vezzi *et al.*, 2005; Chikuma *et*  
486 *al.*, 2007; Tamegai *et al.*, 2013; Leon-Zayas *et al.*, 2015; Vannier *et al.*, 2015; Michoud &  
487 Jebbar, 2016; Xiong *et al.*, 2016; Zhang *et al.*, 2018). These changes could stem directly from  
488 pressure influences or from a greater reliance on the colonization of reduced oxygen niches  
489 associated with particles or animals (Boeuf *et al.*, 2019; Peoples *et al.*, 2019a). This latter  
490 possibility could be facilitated by the *tad* pilus present in the piezophilic *Colwellia* (Planet *et al.*,  
491 2003; Tomich *et al.*, 2007; Pu *et al.*, 2018).

492         Horizontal gene transfer (HGT) can provide genetic material that enhances fitness in new  
493 environments. An experimental demonstration of this impact is the introduction of a DNA  
494 photolyase gene, missing in piezophilic *Colwellia* and other deep-sea species (DeLong *et al.*,  
495 2006; Lauro & Bartlett, 2008; Konstantinidis *et al.*, 2009; Peoples *et al.*, 2019b), into the  
496 piezophile *Photobacterium profundum* SS9 to generate a UV resistant phenotype (Lauro *et al.*,  
497 2014). It is striking that many of the *Colwellia* genes most similar to those in other piezophiles  
498 appear in clusters within variable regions that include genomic islands, putative phage genes,  
499 transposases, and toxin-antitoxin systems. Despite their smaller genome sizes, laterally  
500 transferred elements such as transposase and toxin-antitoxin genes are more abundant in the  
501 piezophilic *Colwellia* examined here, consistent with their lower coding densities. Another  
502 notable feature of these variable regions is that they differ even between closely-related strains,  
503 such as between *Colwellia marinimaniae* MT41 and *C. marinimaniae* MTCD1.

504         Mobile genetic elements have been suggested to confer adaptations to extreme conditions  
505 (e.g. Anderson *et al.*, 2011; Pradel *et al.*, 2013; Feng *et al.*, 2014; Lossouarn *et al.*, 2015; Mao &

506 Grogan, 2017), such as in the known piezophile *Photobacterium profundum* SS9 (Campanaro *et*  
507 *al.*, 2005). Deep-sea specific toxin-antitoxin systems have been identified in members of the  
508 *Shewanella* (Zhang *et al.*, 2019b) and have been shown to influence the growth of *Pyrococcus*  
509 *yayanosii* at different pressures (Li *et al.*, 2016; Li *et al.*, 2018). Mobile genetic elements may  
510 provide new metabolisms within strains of *Colwellia psychrerythraea*, including the transfer of  
511 *sox* genes involved in sarcosine metabolism (Collins & Deming, 2013; Techtmann *et al.*, 2016).  
512 Because of the similarity of many genomic island-associated genes in members of the  
513 piezophilic *Colwellia* to those in other gammaproteobacterial piezophiles, we suggest that HGT  
514 is a significant evolutionary process governing high pressure adaptation. Future studies should  
515 evaluate these regions and their associated genes for their importance in piezophily.

516

## 517 **Conclusions**

518 In this study we compared the genomes of piezophilic and piezosensitive *Colwellia* to  
519 identify adaptations to extreme deep ocean conditions. Differences in amino acid composition,  
520 membrane and cell wall structure, respiratory capacity, tRNA modification, and complex organic  
521 carbon utilization appear to be important for life at hadal depths. Many piezophile-enriched  
522 genes are located near areas of genomic variability and could be shared among piezophiles by  
523 horizontal gene transfer. Some of the adaptations identified may not be for high pressure  
524 adaptation per se, but for lifestyles favored in hadal trenches such as affiliation with particulate  
525 organic carbon or animals.

526

## 527 **Materials and Methods**

528

529 *Sample collection and high-pressure cultivation conditions*

530 *Colwellia* sp. TT2012 was isolated from sediments collected via gravity core in the  
531 Tonga Trench (16° 38.505' S, 172° 12.001' W) at a depth of 9161 m on September 2, 2012  
532 aboard the *R/V* Roger Revelle. Sediment from the upper three cm sediment depth horizon was  
533 mixed with filter-sterilized trench seawater and maintained at a pressure of 84 MPa and 4°C. A  
534 subset of this material was inoculated into ZoBell 2216 Marine Medium (BD Difco, Thermo  
535 Fisher, Waltham, MA, USA) under the same pressure and temperature conditions. *Colwellia* sp.  
536 TT2012 was eventually isolated as a pure culture following a number of dilution to extinction  
537 inoculations.

538 The isolation of both strains of *Colwellia marinimaniae* have been previously described.  
539 *Colwellia marinimaniae* MTCD1 was isolated from amphipods at a depth of 10,918 m in the  
540 Challenger Deep (Kusube *et al.*, 2017). *Colwellia marinimaniae* MT41 was also isolated from  
541 amphipods at a depth of 10,476 m (Yayanos *et al.*, 1981). Both strains were maintained in  
542 pressurizable polyethylene transfer pipette bulbs (Samco Scientific, USA) with Zobell 2216  
543 Marine Medium broth at 4°C and high pressure prior to sequencing.

544

545 *Pressure Sensitivity and Heavy Metal Sensitivity Testing*

546 The growth of the strains was evaluated under different pressure and temperature  
547 conditions. Cultures of *Colwellia* strains 34H, GAB14E, and ND2E were incubated in Zobell  
548 2216 marine medium supplemented with 100 mM HEPES and 20 mM glucose at 4°C. Growth  
549 under high hydrostatic pressure was evaluated by incubating cultures at 20 MPa increments  
550 between 0.1-80 MPa at 4°C and 16°C in triplicate. The OD600 was measured every 2.5 days for  
551 ten days. Growth rates of *Colwellia* sp. TT2012 were conducted at 0.1, 84, and 96 MPa at 4°C.



552 Copper sensitivity tests were also performed on the piezophilic (strains MT41, MTCD1, and  
553 TT2012) and non-piezophilic *Colwellia* strains (strains 34H, GAB14E, ND2E). Copper (II)  
554 chloride dihydrate in concentrations ranging from 0 - 1.5 mM in 0.3 mM increments were added  
555 to inoculated 2216 media and the cultures were incubated at 4°C for 1-4 weeks with weekly  
556 inspection.

557

### 558 *Genome sequencing and assembly*

559 Genomic DNA from *C. marinimaniae* MTCD1 was extracted from 100 mL of liquid  
560 culture after 4 weeks of incubation at 110 MPa. DNA was isolated using the Mo-Bio Ultraclean  
561 Microbial DNA Isolation Kit (Mo-Bio, USA). Genomic DNA was obtained from *Colwellia* sp.  
562 TT2012 after growth at 84 MPa and 4°C for 3 weeks. Cells were filtered onto a 0.22 µm  
563 Millipore Sterivex filter cartridge (Fischer Scientific, USA) and first subjected to a lysis buffer  
564 (50mM Tris-HCl at pH 8.3, 40mM EDTA at pH 8.0, 0.75 M sucrose) and R1804M Ready-Lyse  
565 lysozyme solution (Illumina, USA). After 15 minutes of incubation at 37°C, proteinase K and  
566 sodium dodecyl sulfate were added to a final concentration of 0.5mg/ml and 1% respectively.  
567 The mixture was then incubated at 55°C for 25 minutes, followed by 70°C for 5 minutes. The  
568 lysate was treated two times with phenol-chloroform-isoamyl alcohol (24:24:1) and  
569 chloroform:isoamyl alcohol (24:1) and further purified using a Mo-Bio Ultraclean DNA Isolation  
570 Kit spin column. The genomes of *C. marinimaniae* and *Colwellia* sp. TT2012 were sequenced at  
571 the Institute for Genomic Medicine (IGM) at UCSD using the MiSeq sequencing platform  
572 (Illumina, San Diego). The raw forward and reverse reads were merged using FLASH version  
573 1.2.10 (Magoč & Salzberg, 2011) and assembled with SPAdes version 3.1.0 (Bankevich et al.,  
574 2012).

575           The genome of strain MT41 was sequenced to closure by whole random shotgun  
576 sequencing. Briefly, one small insert plasmid library (2–3 kb) and one medium insert plasmid  
577 library (10-15 kb) were constructed by random nebulization and cloning of genomic DNA. The  
578 sequences were assembled using the TIGR Assembler (Sutton *et al.*, 1995). All sequence and  
579 physical gaps were closed by editing the ends of sequence traces, primer walking on plasmid  
580 clones, and combinatorial PCR followed by sequencing of the PCR product.

581

### 582 *Genomic completeness, phylogenetic analysis, and annotation*

583           The genomes were evaluated for their completeness and phylogenetic relationships.  
584 Genome completeness and contamination was estimated using CheckM (Parks *et al.*, 2015). A  
585 whole-genome phylogenetic tree was built using RAxML (Stamatakis *et al.*, 2014) on the  
586 CIPRES science gateway (Miller *et al.*, 2010) using the single-copy marker genes identified  
587 within CheckM. Ribosomal 16S RNA gene trees were also built by aligning sequences using the  
588 SINA Aligner (Pruesse *et al.*, 2012) and built using RAxML All trees were visualized using the  
589 Interactive Tree of Life (Letunic & Bork, 2016). Genomes were annotated using the Integrated  
590 Microbial Genomes pipeline (IMG/ER; Markowitz *et al.*, 2014). Pairwise average nucleotide  
591 identity between the genomes was evaluated within both the IMG interface and with orthoANI  
592 (Lee *et al.*, 2016).

593

### 594 *Comparative genomic analysis*

595           A comparative genomic analysis was performed between the piezophilic and non-  
596 piezophilic strains of *Colwellia* to identify whole-genome changes and specific genes unique to  
597 piezophiles. The isoelectric point (pI) of each predicted proteome was calculated using the

598 compute pI/MW tool in the ExPASy Bioinformatics Resource Portal (Artimo *et al.*, 2012).  
599 Isoelectric point values from ExPASy were rounded to the nearest tenth and the frequency of  
600 each protein pI was plotted in Figure 2a as a percent of the total proteome. Each proteome was  
601 divided into an acidic set of proteins ( $pI < 7$ ;  $N_a$ ) and a basic set ( $pI > 7$ ;  $N_b$ ) and the bias quantified  
602 using the formula  $((N_b - N_a) / (N_b + N_a) \times 100)$ . The pI bias percentage is calculated such that 100%  
603 means the proteins in the entire proteome are basic, -100% means all the proteins are acidic, and  
604 0% means equal percentage of basic and acidic proteins.

605 To identify specific amino acid substitutions that may correlate with piezophily, amino  
606 acid asymmetry was calculated using the procedure and software described in McDonald *et al.*  
607 (McDonald *et al.*, 1999). First, proteins from the genomes were clustered using TribeMCL  
608 (Enright *et al.*, 2002; scripts available at <https://github.com/juanu/MicroCompGenomics>) with a  
609 Blastp cutoff of  $1e-5$  and an inflation value of 1.4. Orthologous single-copy gene clusters present  
610 in both the piezophiles and *Colwellia psychrerythraea* 34H were aligned using MAFFT (Kato  
611 & Toh, 2008) and then processed with the Asymmetry programs AmbiguityRemover (using a  
612 value of 2 for the number of adjacent sites), AsymmetryCounter, and AsymmetryScaler (with  
613 three decimal places and 100 replicates; McDonald *et al.*, 1999). Approximately 346,000 aligned  
614 amino acid sites were examined in each comparison. Comparisons were also performed between  
615 the *Shewanella* strains *S. benthica* KT99, *S. violacea* DSS12, and *S. piezotolerans* WP3 against  
616 the piezosensitive *S. sediminis* EB3.

617 Protein abundances from the genomes were compared to identify attributes preferentially  
618 enriched in either the piezophiles or piezosensitive strains. General COG category distributions  
619 were evaluated using IMG/ER annotations. For the identification of differentially-abundant  
620 specific proteins, protein clusters were generated using the TribeMCL analysis as described

621 above. These identified protein clusters were further screened using blastp (Altschul *et al.*, 1990)  
622 against the nr database for their prevalence in other *Colwellia* genomes, other piezophile  
623 genomes, or other metagenomes. This manual curation allowed for the identification of both  
624 genes differentially abundant within the groups of genomes immediately discussed here but also  
625 allowed for a culled, smaller dataset of genes that may be present in other deep-ocean isolates  
626 and datasets.

627         Certain genomic features within the genomes were also identified. Genomic islands were  
628 identified using IslandViewer (Bertelli *et al.*, 2017). Regions that may represent genomic islands  
629 were also identified using the Mean Shift Genomic Island Predictor (MSGIP; de Brito *et al.*,  
630 2016). As incomplete genomes appeared to give spurious results, the total number of genomic  
631 islands are reported only for the complete genomes of *Colwellia marinimaniae* MT41 and *C.*  
632 *psychrerythraea* 34H. However, genomic islands for some of the partial genomes are shown here  
633 (e.g. Figure 4, Figure 5) only when IslandViewer or MSGIP identified a region as a genomic  
634 island, it was in a similar region as a genomic island found in either of the 34H or MT41  
635 genomes, and it appeared to be a region of variability based on IMG/ER annotations. The  
636 homology of these variable regions was analyzed using blastn and visualized with the R package  
637 genoPlotR (Guy *et al.*, 2010) and Kablammo (Wintersinger *et al.*, 2015). Putative transposases  
638 and toxin/antitoxin genes were identified based on IMG/ER annotations. Putative viral regions of  
639 each genome were also identified based predominantly on IMG/ER annotations with a functional  
640 search using the terms ‘phage’ and ‘virus,’ but also with VirFinder (Ren *et al.*, 2017) and  
641 VirSorter (Roux *et al.*, 2015). Different types of flagella and pili were annotated using  
642 MacSyFinder and TXSScan (Abby *et al.*, 2016; <https://galaxy.pasteur.fr/#forms::txsscan>) with

643 default parameters. Carbohydrate-active enzymes within each genome were identified using  
644 dbCAN (Yin *et al.*, 2012).

645

## 646 **Declarations**

647 *Ethics approval and consent to participate*

648 Not applicable.

649

650 *Consent for publication*

651 Not applicable.

652

653 *Availability of data and material*

654 The genome sequences of strains MT41, MTCD1, and TT2012 have been deposited at  
655 GenBank under the accessions CP013145, GCA\_001432325, and GCA\_001440345,  
656 respectively. The assembled and annotated genomes of strains MT41, MTCD1, and TT2012 can  
657 be located in IMG/JGI under the IMG taxon IDs 2501651205, 2585427605, and 2585428047  
658 respectively.

659

660 *Competing interests*

661 The authors declare that they have no competing interests.

662

663 *Funding*

664 This work was supported by funding from the National Science Foundation (1536776),  
665 the National Aeronautics and Space Administration (NNX11AG10G), the Prince Albert II

666 Foundation (Project 1265), the Sloan Foundation Deep Carbon Observatory/Deep Life  
667 Community, and UC Ship Funds program and private donor support for the Microbial  
668 Oceanography of the Tonga Trench (MOTT) expedition. TSK was supported by an  
669 undergraduate fellowship from the UCSD Foundation.

670

#### 671 *Authors' contributions*

672 LMP, TSK, JAU, KM, RAC, AAY, BAM performed experimental and bioinformatics  
673 work. LMP, TSK, DHB performed data analysis. LMP, TSK, DHB wrote the manuscript. All  
674 authors read and approved the final manuscript.

675

#### 676 *Acknowledgements*

677 We thank Stephen Techtmann and Terry Hazen for providing the *Colwellia*  
678 *psychrerythraea* strains GAB14E and ND2E. Thanks to Priya Narasingarao and Sheila Podell for  
679 constructive input. We appreciate the support of the crew of the *R/V Revelle* and those associated  
680 with the MOTT expedition for their help collecting these samples. This includes but is not  
681 limited to Rosa Leon-Zayas, Jenan Kharbush, Rachael Hazael, and Fabrizia Foglia.

682

683

684

685

686

687

688

689

690

691

692

693

694 **References**

- 695
- 696 Abby SS, Cury J, Guglielmini J, Néron B, Touchon M, Rocha EPC. Identification of protein  
697 secretion systems in bacterial genomes. *Sci Rep.* 2016;6:23080.
- 698
- 699 Abe F. Dynamic structural changes in microbial membranes in response to high hydrostatic  
700 pressure analyzed using time-resolved fluorescence anisotropy measurement. *Biophysical*  
701 *Chemistry.* 2013;183:3-8.
- 702
- 703 Allen EA, Facciotti D, Bartlett DH. Monosaturated but not polyunsaturated fatty acids are  
704 required for growth of the deep-sea bacterium *Photobacterium profundum* SS9 at high pressure  
705 and low temperature. *Appl Environ Microbiol.* 1999;65:1710-1720.
- 706
- 707 Altschul SF, Gish W, Miller W, Myers EW, Lipman DJ. Basic local alignment search tool.  
708 *Journal of Molecular Biology.* 1990;215:403-410.
- 709
- 710 Anderson RE, Brazelton WJ, Baross JA. Is the genetic landscape of the deep subsurface  
711 biosphere affected by viruses? *Front Microbiol.* 2011;2:219.
- 712
- 713 Aono E, Baba T, Ara T, Nishi T, Nakamichi T, Inamoto E, Toyonaga H, Hasegawa M, Takai Y,  
714 Okumura Y, Baba M, Tomita M, Kato C, Oshima T, Nakasone K, Mori H. Complete genome  
715 sequence and comparative analysis of *Shewanella violacea*, a psychrophilic and piezophilic  
716 bacterium from deep sea floor sediments. *Molecular BioSystems.* 2010;6:1216-1226.
- 717
- 718 Arrieta JM, Mayol E, Hansman RL, Herndl GJ, Dittmar T, Duarte CM. Dilution limits dissolved  
719 organic carbon utilization in the deep ocean. *Science.* 2015;348:331-333.
- 720
- 721 Artimo P, Jonnalagedda M, Arnold K, Baratin D, Csardi G, de Castro E, Duvaud S, Flegel V,  
722 Fortier A, Grosdidier EGA, Hernandez C, Ioannidis V, Kuznetsov D, Liechti R, Moretti S,  
723 Mostaguir K, Redaschi N, Rossier G, Xenarios I, Stockinger H. ExPASy: SIB bioinformatics  
724 resource portal. *Nucl Acid Res.* 2012;40:W597-W603.
- 725
- 726 Baker LJ, Freed LL, Easson CG, Lopez JV, Fenolio D, Sutton TT, Nyholm SV, Hendry TA.  
727 Diverse deep-sea anglerfishes share a genetically reduced luminous symbiont that is acquired  
728 from the environment. *eLife.* 2019;8: e47606.
- 729
- 730 Bankevich A, Nurk S, Antipov D, Gurevich AA, Dvorkin M, Kulikov AS, Lesin VM, Nikolenko  
731 SI, Pham S, Prjibelski AD, Pyshkin AV, Sirotkin AV, Vyahhi N, Tesler T, Alekseyev MA,  
732 Pevzner PA. SPAdes: A new genome assembly algorithm and its applications to single-cell  
733 sequencing. *Journal of Computational Biology.* 2012;19:455-477.
- 734
- 735 Bartlett, D, Chi E. Genetic characterization of *ompH* mutants in the deep-sea bacterium  
736 *Photobacterium sp.* strain SS9. *Arch. Microbiol.* 1994;162:323-328.
- 737
- 738 Bartlett D, Wright M, Yayanos AA, Silverman M. Isolation of a gene regulated by hydrostatic  
739 pressure in a deep-sea bacterium. *Nature.* 1989;342:572-574.

740  
741 Bertelli C, Laird MR, Williams KP, Simon Fraser University Research Computing Group, Lau  
742 BY, Hoad G, Winsor GL, Brinkman FSL. IslandViewer 4: expanded prediction of genomic  
743 islands for larger-scale datasets. *Nucl Acid Res.* 2017;45:W30-W35.  
744  
745 Beszteri B, Temperton B, Frickenhaus S, Giovannoni SJ. Average genome size: a potential  
746 source of bias in comparative metagenomics. *ISME J.* 2010;4:1075-1077.  
747  
748 Boeuf D, Edwards BR, Eppley JM, Hu SK, Poff KE, Romano AE, Caron DA, Karl DM, DeLong  
749 EF. Biological composition and microbial dynamics of sinking particulate organic matter at  
750 abyssal depths in the oligotrophic open ocean. *Proc Natl Acad Sci.* 2019; 201903080.  
751  
752 Bowman JP. The family Colwelliaceae. *The Prokaryotes.* 2014;179-195.  
753  
754 Campanaro S, Vezzi A, Vitulo N, Lauro FM, D'Angelo M, Simonato F, Cestaro A, Malacrida G,  
755 Bertoloni G, Valle G, Bartlett DH. Laterally transferred elements and high pressure adaptation in  
756 *Photobacterium profundum* strains. *BMC Genomics.* 2005;6:122.  
757  
758 Campanaro, S, De Pascale, F, Telatin, A, Schiavon, R, Bartlett, DH, Valle. G. The  
759 transcriptional landscape of the deep-sea bacterium *Photobacterium profundum* in both a *toxR*  
760 mutant and its parental strain. *BMC Genomics* 2012;13:567.  
761  
762 Chen SC, Sun GX, Rosen BP, Zhang SY, Deng Y, Zhu BK, Rensing C, Zhu YG. Recurrent  
763 horizontal transfer of arsenite methyltransferase genes facilitated adaptation of life to arsenic. *Sci*  
764 *Rep.* 2017;7:7741.  
765  
766 Chi E, Bartlett DH. An *rpoE*-like locus controls outer membrane protein synthesis and growth at  
767 cold temperatures and high pressures in the deep-sea bacterium *Photobacterium* sp. Strain SS9.  
768 *Mol Microbiol.* 1995;17:713-726.  
769  
770 Chikuma S, Kasahara R, Kato C, Tamegai H. Bacterial adaptation to high pressure: a respiratory  
771 system in the deep-sea bacterium *Shewanella violacea* DSS12. *FEMS Microbiology Letters.*  
772 2007;267:108-112.  
773  
774 Colangelo-Lillis JR, Deming JW. Genomic analysis of cold-active Colwelliaphage 9A and  
775 psychrophilic phage-host interactions. *Extremophiles.* 2013;17:99-114.  
776  
777 Collins RE, Deming JW. An inter-order horizontal gene transfer event enables the catabolism of  
778 compatible solutes by *Colwellia psychrerythraea* 34H. *Extremophiles.* 2013;17:601-610.  
  
779 Dalmasso C, Oger P, Selva G, Courtine D, L'Haridon S, Garlaschelli A, Roussel E, Miyazaki J,  
780 Reveillaud J, Jebbar M, Takai K, Maignien L, Alain K. *Thermococcus piezophilus* sp. nov., a  
781 novel hyperthermophilic and piezophilic archaeon with a broad pressure range for growth,  
782 isolated from a deepest hydrothermal vent at the Mid-Cayman Rise. *Syst Appl Microbiol.* 2016;  
783 39: 440-444.



- 784 Paul S, Bag SK, Das S, Harvill ET, Dutta C. Molecular signature of hypersaline adaptation:  
785 insights from genome and proteome composition of halophilic prokaryotes. *Genome Biol.* 2008;  
786 9:R70  
787
- 788 De Brito DM, Maracaja-Coutinho V, de Farias ST, Batista LV, do Rêgo TG. A novel method to  
789 predict genomic islands based on mean shift clustering algorithm. *PLoS One.* 2016;11:e0146352.  
790
- 791 DeLong E, Franks DG, Yayanos AA. Evolutionary relationships of cultivated psychrophilic and  
792 barophilic deep-sea bacteria. *Appl Environ Microbiol.* 1997;63:2105-2108.  
793
- 794 DeLong EF, Yayanos AA. Adaptation of the membrane lipids of a deep-sea bacterium to  
795 changes in hydrostatic pressure. *Science.* 1985;228:1101-1103.  
796
- 797 DeLong EF, Yayanos, AA. Biochemical function and ecological significance of novel bacterial  
798 lipids in deep-sea prokaryotes. *Appl Environ Microbiol.* 1986;51:730-7.  
799
- 800 DeLong EF, Preston CM, Mincer T, Rich V, Hallam SJ, Frigaard N, Martinez A, Sullivan MB,  
801 Edwards R, Rodriguez Brito B, Chisholm SW, Karl DM. Community genomics among stratified  
802 microbial assemblages in the ocean's interior. *Science.* 2006;311:496-503.  
803
- 804 Deming JW, Somers LK, Straube WL, Swartz DG, Macdonell MT. Isolation of an obligately  
805 barophilic bacterium and description of a new genus, *Colwellia* gen. nov. *Systemic and Applied*  
806 *Microbiology.* 1988;10:152-160.  
807
- 808 Di Giulio M. A comparison of proteins from *Pyrococcus furiosus* and *Pyrococcus abyssi*:  
809 barophily in the physicochemical properties of amino acids and in the genetic code. *Gene.*  
810 2005;346:1-6.  
811
- 812 Dombrowski N, Teske AP, Baker BJ. Expansive microbial metabolic versatility and biodiversity  
813 in dynamic Guaymas Basin hydrothermal sediments. *Nat Comm.* 2018;9:4999.  
814
- 815 Dykstra S, Bischof K, Fuchs BM, Hoffmann K, Meier D, Meyerdierks A, Pjevac P, Probandt D,  
816 Richter M, Stepanauskas R, Mußmann M. Ubiquitous Gammaproteobacteria dominate dark  
817 carbon fixation in coastal sediments. *ISME J.* 2016;10:1939-1953.  
818
- 819 El-Hajj, ZW, Tryfona, T, Allcock, DJ, Hasan, F., Lauro, FM, Sawyer, L, Bartlett, DH, and  
820 Ferguson, GP. 2009. Importance of proteins controlling initiation of DNA replication in  
821 the growth of the high-pressure-loving bacterium *Photobacterium profundum* SS9. *J. Bacteriol.*  
822 191: 6383-6393.  
823
- 824 Enright AJ, Van Dongen S, Ouzounis CA. An efficient algorithm for large-scale detection of  
825 protein families. *Nucl Acid Res.* 2002;30:1575-1584.  
826
- 827 Eloë EA, Lauro FM, Vogel RF, Bartlett DH. The deep-sea bacterium *Photobacterium profundum*  
828 SS9 utilizes separate flagellar systems for swimming and swarming under high-pressure  
829 conditions. *Appl Environ Microbiol.* 2008;74:6298-6305.

830  
831 Eloë EA, Fadrosch DW, Novotny M, Allen LZ, Kim M, Lombardo MJ, Yee-Greenbaum J,  
832 Yooseph S, Allen EE, Lasken R, Williamson SJ, Bartlett DH. Going deeper: metagenome of a  
833 hadopelagic microbial community. *PloS One*. 2011;6:e20388.  
834  
835 Faruque SM, Mekalanos JJ. Pathogenicity islands and phages in *Vibrio cholerae* evolution.  
836 *Trends in Microbiology*. 2003;11:505-510.  
837  
838 Feng Z, Caceres NE, Sarath G, Barletta RG. *Mycobacterium smegmatis* L-alanine  
839 dehydrogenase (Ald) is required for proficient utilization of alanine as a sole nitrogen source and  
840 sustained anaerobic growth. *J Bacteriol*. 2002;184:5001-5010.  
841  
842 Feng S, Powell SM, Wilson R, Bowman JP. Extensive gene acquisition in the extremely  
843 psychrophilic bacterial species *Psychroflexus torquis* and the link to sea-ice ecosystem  
844 specialism. *Genome Biol Evol*. 2014;6:133-148.  
845  
846 Fontanez KM, Eppley JM, Samo TJ, Karl DM, DeLong EF. Microbial community structure and  
847 function on sinking particles in the North Pacific Subtropical Gyre. *Front Microbiol*. 2015;6:469.  
848  
849 Gallegos MT, Schleif R, Bairoch A, Hofmann K, Ramos JL. Arac/XylS family of transcriptional  
850 regulators. *Microbiol Mol Biol Rev*. 1997;61:393-410.  
851  
852 Ganesh S, Parris DJ, DeLong EF, Stewart FJ. Metagenomic analysis of size-fractionated  
853 picoplankton in a marine oxygen minimum zone. *ISME J*. 2014;8:187-211.  
854  
855 Guy L, Kultima JR, Andersson SGE. genoPlotR: comparative gene and genome visualization in  
856 R. *Bioinformatics*. 2010;26:2334-2335.  
857  
858 Guelorget A, Roovers M, Guérineau V, Barbey C, Li X, Golinelli-Pimpaneau B. Insights into the  
859 hyperthermostability and unusual region-specificity of archaeal *Pyrococcus abyssi* tRNA  
860 m<sup>1</sup>A57/58 methyltransferase. *Nucl Acid Res*. 2010;38:6206-6218.  
861  
862 Hoffmann K, Hassenrück C, Salman-Carvalho V, Holtappels M, Bienhold C. Response of  
863 bacterial communities to different detritus compositions in Arctic deep-sea sediments. *Front*  
864 *Microbiol*. 2017;8:226.  
865  
866 Holtwick R, Meinhardt F, Keweloh H. cis-trans isomerization of unsaturated fatty acids: Cloning  
867 and sequencing of the cti gene from *Pseudomonas putida* P8. *Appl Environ Microbiol*.  
868 1997;63:4292-4297.  
869  
870 Hummer G, Garde S, Garcia AE, Paulaitis ME, Pratt LR. The pressure dependence of  
871 hydrophobic interactions is consistent with the observed pressure denaturation of proteins. *Proc*  
872 *Natl Acad Sci*. 1998;95:1552-1555.  
873

- 874 Huston AL, Krieger-Brockett BB, Deming JW. Remarkably low temperature optima for  
875 extracellular enzyme activity from Arctic bacteria and sea ice. *Environ Microbiol.* 2000;2:383-  
876 388.
- 877  
878 Hutter B, Dick T. Increased alanine dehydrogenase activity during dormancy in *Mycobacterium*  
879 *spematis*. *FEMS Microbiology Letters.* 1998;167:7-11.
- 880  
881 Ivars-Martinez E, Martin-Cuadrado AB, D'Auria G, Mira A, Ferriera S, Johnson J, Friedman R,  
882 Rodriguez-Valera F. Comparative genomics of two ecotypes of the marine planktonic copiotroph  
883 *Alteromonas macleodii* suggests alternative lifestyles associated with different kinds of  
884 particulate organic matter. *ISME J.* 2008;2:1194-1212.
- 885  
886 Jebbar M, Franzetti B, Girard E, Oger P. Microbial diversity and adaptation to high hydrostatic  
887 pressure in deep-sea hydrothermal vents prokaryotes. *Extremophiles.* 2015;19:721-740.
- 888  
889 Jeong JA, Oh JI. Alanine dehydrogenases in mycobacteria. *Journal of Microbiology.*  
890 2019;57:81-92.
- 891  
892 Jun X, Lupeng L, Minjuan X, Oger P, Fengping W, Jebbar M, Xiang X. Complete genome  
893 sequence of the obligate piezophilic hyperthermophilic archaeon *Pyrococcus yayanosii* CH1. *J*  
894 *Bacteriol.* 2011;193:4297-4298.
- 895  
896 Kiraga J, Mackiewicz P, Mackiewicz D, Kowalczyk M, Biecek P, Polak N, Smolarczyk K,  
897 Dudek MR, Cebrat S. The relationships between the isoelectric point and: length of proteins,  
898 taxonomy and ecology of organisms. *BMC Genomics.* 2007;8:163.
- 899  
900 Kleindienst S, Seidel M, Ziervogel K, Grim S, Loftis K, Harrison S, Malkin SY, Perkins MJ,  
901 Field J, Sogin ML, Dittmar T, Passow U, Medeiros PM, Joye SB. Chemical dispersants can  
902 suppress the activity of natural oil-degrading microorganisms. *Proc Natl Acad Sci.*  
903 2015;112:14900-14905.
- 904  
905 Konstantinidis KT, Braff J, Karl DM, DeLong EF. Comparative metagenomic analysis of a  
906 microbial community residing at a depth of 4,000 meters at Station ALOHA in the North Pacific  
907 Subtropical Gyre. *Appl Environ Microbiol.* 2009;75:5345-5355.
- 908  
909 Kusube M, Kyaw TS, Tanikawa K, Chastain RA, Hardy KM, Cameron J, Bartlett DH. *Colwellia*  
910 *marinimaniae* sp. nov., a hyperpiezophilic species isolated from an amphipod within the  
911 Challenger Deep, Mariana Trench. *Int J Sys Evol Microbiol.* 2017;67:824-831.
- 912  
913 Kyrpides NC, Woyke T, Eisen JA, Garrity G, Lilburn TG, Beck BJ, Whitman WB, Hugenholtz  
914 P, Klenk HP. Genomic Encyclopedia of Type Strains, Phase I: The one thousand microbial  
915 genomes (KMG-I) project. *Standards in Genomic Sciences.* 2014;9:9031278.
- 916  
917 Landry Z, Swan BK, Herndl GJ, Stepanauskas R, Giovannoni SJ. SAR202 genomes from the  
918 dark ocean predict pathways for the oxidation of recalcitrant dissolved organic matter. *mBio.*  
919 2017;8:e00413-17.

920  
921 Lauro FM, Chastain RA, Blankenship LE, Yayanos AA, Bartlett DH. The unique 16S rRNA  
922 genes of piezophiles reflect both phylogeny and adaptation. *Appl Environ Microbiol.*  
923 2007;73:838-845.  
924  
925 Lauro, FM, Tran, K., Vezzi, A., Vitulo, N., Valle, G., Bartlett, DH. Large-scale transposon  
926 mutagenesis of *Photobacterium profundum* SS9 reveals new genetic loci important for growth at  
927 low temperature and high pressure. *J. Bacteriol.* 2007;190: 1699-1709.  
928  
929 Lauro FM, Bartlett DH. Prokaryotic lifestyles in deep sea habitats. *Extremophiles.* 2008;12;15-  
930 25.  
931  
932 Lauro FM, Chastain RA, Ferriera S, Johnson J, Yayanos AA, Bartlett DH. Draft genome  
933 sequence of the deep-sea bacterium *Shewanella benthica* strain KT99. *Genome Announc.*  
934 2013a;1:e00210-13.  
935  
936 Lauro FM, Stratton TK, Chastain RA, Ferriera S, Johnson J, Goldberg SMD, Yayanos AA,  
937 Bartlett DH. Complete genome sequence of the deep-sea bacterium *Psychromonas* strain  
938 CNPT3. *Genome Announc.* 2013b;1:e00304-13.  
939  
940 Lauro FM, Eloë-Fadrosh EA, Richter TKS, Vitulo N, Ferriera S, Johnson JH, Bartlett DH.  
941 Ecotype diversity and conversion in *Photobacterium profundum* strains. *PLoS One.*  
942 2014;9:e96953.  
943  
944 Lee I, Kim YO, Park SC, Chun J. OrthoANI: An improved algorithm and software for  
945 calculating average nucleotide identity. *Int J Sys Evol Microbiol.* 2016;66:1100-1103.  
946  
947 Leon-Zayas R, Novotny M, Podell S, Shepard CM, Berkenpas E, Nikolenko S, Pevzner P,  
948 Lasken RS, Bartlett DH. Single cells within the Puerto Rico Trench suggest hadal adaptation of  
949 microbial lineages. *Appl Environ Microbiol.* 2015;81:8265-8276.  
950  
951 Letunic I, Bork P. Interactive tree of life (iTOL) v3: an online tool for the display and annotation  
952 of phylogenetic and other trees. *Nucl Acid Res.* 2016;44:W242-W245.  
953  
954 Li Z, Li X, Xiao X, Xu J. An integrative genomic island affects the adaptations of the piezophilic  
955 hyperthermophilic archaeon *Pyrococcus yayanosii* to high temperature and high hydrostatic  
956 pressure. *Front Microbiol.* 2016;7:1927.  
957  
958 Li Z, Song Q, Wang Y, Xiao X, Xu J. Identification of a functional toxin-antitoxin system  
959 located in the genomic island PYG1 of piezophilic hyperthermophilic archaeon *Pyrococcus*  
960 *yayanosii*. *Extremophiles.* 2018;22:347-357.  
961  
962 Loffeld B, Keweloh H. cis/trans isomerization of unsaturated fatty acids as possible control  
963 mechanism of membrane fluidity in *Pseudomonas putida* P8. *Lipids.* 1996;31:811-815.  
964

- 965 Lossouarn J, Dupont S, Gorlas A, Mercier C, Bienvenu N, Marguet E, Forterre P, Geslin C. An  
966 abyssal mobilome: viruses, plasmids, and vesicles from deep-sea hydrothermal vents. *Research*  
967 *in Microbiology*. 2015;166:742-752.  
968
- 969 Lucas S, Han J, Lapidus A, Cheng JF, Goodwin LA, Pitluck S, Peters L, Mikhailova N, Teshima  
970 H, Detter JC, Han C, Tapia R, Land M, Hauser L, Kyrpides NC, Ivanova N, Pagani I, Vannier P,  
971 Oger P, Bartlett DH, Noll KM, Woyke T, Jebbar M. Complete genome sequence of the  
972 thermophilic, piezophilic, heterotrophic bacterium *Marinitoga piezophila* KA3. *J Bacteriol*.  
973 2012;194:5974-5975.  
974
- 975 Luo H, Tolar BB, Swan BK, Zhang CL, Stepanauskas R, Moran MA, Hollibaugh JT. Single-cell  
976 genomics shedding light on marine *Thaumarchaeota* diversification. *ISME J*. 2014;8:732-736.  
977
- 978 Maddocks SE, Oyston PCF. Structure and function of the LysR-type transcriptional regulator  
979 (LTTR) family proteins. *Microbiology*. 2008;154:3609-3623.  
980
- 981 Martin D, Bartlett DH, Roberts MF. Solute accumulation in the deep-sea bacterium  
982 *Photobacterium profundum*. *Extremophiles*. 2002;6:507-514.  
983
- 984 Katoh K, Toh H. Recent developments in the MAFFT multiple sequence alignment program.  
985 *Briefings in Bioinformatics*. 2008;9:286-298.  
986
- 987 Magoč T, Salzberg SL. FLASH: fast length adjustment of short reads to improve genome  
988 assemblies. *Bioinformatics*. 2011;27:2957-2963.  
989
- 990 Mao D, Grogan DW. How a genetically stable extremophile evolves: Modes of genome  
991 diversification in the Archaeon *Sulfolobus acidocaldarius*. *J Bacteriol*. 2017;199:e00177-17.  
992
- 993 Markowitz VM, Chen IMA, Palaniappan K, Chu K, Szeto E, Pillay M, Ratner A, Huang J,  
994 Woyke T, Anderson MHI, Billis K, Varghese N, Mavromatis K, Pati A, Ivanova NN, Kyrpides  
995 NC. IMG 4 version of the integrated microbial genomes comparative analysis system. *Nucl Acid*  
996 *Res*. 2014;42:D560-D567.  
997
- 998 Martin-Cuadrado AB, Lopez-Garcia P, Alba JC, Moreira D, Monticelli L, Strittmatter A,  
999 Gottschalk G, Rodriguez-Valera F. Metagenomics of the deep Mediterranean, a warm  
1000 bathypelagic habitat. *PLoS One*. 2007;9:e914.  
1001
- 1002 Marx JG, Carpenter SD, Deming JW. Production of cryoprotectant extracellular polysaccharide  
1003 substances (EPS) by the marine psychrophilic bacterium *Colwellia psychrerythraea* strain 34H  
1004 under extreme conditions. *Canadian Journal of Microbiology*. 2009;55:63-72.  
1005
- 1006 Mason OU, Han J, Woyke T, Jansson JK. Single-cell genomics reveals features of a *Colwellia*  
1007 species that was dominant during the Deepwater Horizon oil spill. *Front Microbiol*. 2014;5:332.  
1008
- 1009 McCutcheon JP, Moran NA. Extreme genome reduction in symbiotic bacteria. *Nat Rev*  
1010 *Microbiol*. 2012;10:13-26.

- 1011  
1012 McDonald JH, Grasso AM, Rejto LK. Patterns of temperature adaptation in proteins from  
1013 Methanococcus and Bacillus. Mol Biol Evol. 1999;16:1785-1790.  
1014  
1015 Meganathan R, Marquis RE. Loss of bacterial motility under pressure. Nature. 1973;246:525.  
1016  
1017 Methé BA, Nelson KE, Deming JW, Momen B, Melamud E, Zhang X, Moulton J, Madupu R,  
1018 Nelson WC, Dodson RJ, Brinkac LM, Daugherty SC, Durkin AS, DeBoy RT, Kolonay JF,  
1019 Sullivan SA, Zhou L, Davidsen TM, Wu M, Huston AL, Lewis M, Weaver B, Weidman JF,  
1020 Khouri H, Utterback TR, Feldblyum TV, Fraser CM. The psychrophilic lifestyle as revealed by  
1021 the genome sequence of *Colwellia psychrerythraea* 34H through genomic and proteomic  
1022 analyses. Proc Natl Acad Sci. 2005;102:10913-10918.  
1023  
1024 Michoud G, Jebbar M. High hydrostatic pressure adaptive strategies in an obligate piezophile  
1025 *Pyrococcus yayanosii*. Sci Rep. 2016;6:27289.  
1026  
1027 Miller MA, Pfeiffer W, Schwartz T. Creating the CIPRES Science Gateway for inference of  
1028 large phylogenetic trees. In 2010 Gateway Computing Environments Workshop (GCE). 2010;1-  
1029 8.  
1030  
1031 Mußmann M, Pjevac P, Krüger K, Dykstra S. Genomic repertoire of the *Woeseiaceae*/JTB255,  
1032 cosmopolitan and abundant core members of microbial communities in marine sediments. ISME  
1033 J. 2017;11:1276-1281.  
1034  
1035 Nakayama A, Saito R, Matsuzaki M, Yano Y, Yoshida K. Phylogenetic analysis based on 16S  
1036 rRNA gene sequences of deep-sea bacteria isolated from intestinal contents of deep-sea fishes  
1037 retrieved from the abyssal zone. J Gen Appl Microbiol. 2005;51:385-394.  
1038  
1039 Navarro CA, von Bernath D, Jerez CA. Heavy metal resistance strategies of acidophilic bacteria  
1040 and their acquisition: Importance for biomining and bioremediation. Biological Research.  
1041 2013;46:363-371.  
1042  
1043 Nogi Y, Hosoya S, Kato C, Horikoshi K. *Colwellia piezophila* sp. nov., a novel piezophilic  
1044 species from deep-sea sediments of the Japan Trench. Int J Sys Evol Microbiol. 2004;54:1627-  
1045 1631.  
1046  
1047 Nogi Y. Microbial life in the deep sea: Psychropiezophiles. In: Margesin R, editor.  
1048 Psychrophiles: From Biodiversity to Biotechnology. Springer, Cham; 2017. p. 133-152.  
1049  
1050 Nunn BL, Slattery KV, Cameron KA, Timmins-Schiffman E, Junge K. Proteomics of *Colwellia*  
1051 *psychrerythraea* at subzero temperatures – a life with limited movement, flexible membranes  
1052 and vital DNA repair. Environ Microbiol. 2015;17:2319-2335.  
1053  
1054 Oger PM, Jebbar M. The many ways of coping with pressure. Research in Microbiology.  
1055 2010;161:799-809.  
1056

- 1057 Orellana LH, Jerez CA. A genomic island provides *Acidithiobacillus ferrooxidans* ATCC 53993  
1058 additional copper resistance: a possible competitive advantage. *Appl Microbiol Biotech.*  
1059 2011;92:761.  
1060
- 1061 Pachiadaki MG, Sintes E, Bergauer K, Brown JM, Record NR, Swan BK, Mathyer ME, Hallam  
1062 SJ, Lopez-Garcia P, Takaki Y, Nunoura T, Woyke T, Herndl GJ, Stepanauskas R. Major role of  
1063 nitrite-oxidizing bacteria in dark ocean carbon fixation. *Science.* 2017;358:1046-1051.  
1064
- 1065 Parks DH, Imelfort M, Skennerton CT, Hugenholtz P, Tyson GW. CheckM: assessing the quality  
1066 of microbial genomes recovered from isolates, single cells, and metagenomes. *Genome Res.*  
1067 2015;25:1043-1055.  
1068
- 1069 Peoples LM, Bartlett DH. Ecogenomics of deep-ocean microbial bathytypes. In: Chénard C,  
1070 Lauro FM, editors. *Microbial Ecology of Extreme Environments.* Springer, Cham; 2017. p. 7-50.  
1071
- 1072 Peoples LM, Donaldson S, Osuntokun O, Xia Q, Nelson A, Blanton J, Allen EE, Church MJ,  
1073 Bartlett DH. Vertically distinct microbial communities in the Mariana and Kermadec trenches.  
1074 *PLoS One.* 2018;13:e0195102.  
1075
- 1076 Peoples LM. *Composition and Functional Potential of Hadal Microbial Communities.*  
1077 eScholarship, University of California; 2018.  
1078
- 1079 Peoples LM, Grammatopoulou E, Pombrol M, Xu X, Osuntokun O, Blanton J, Allen EE,  
1080 Nunnally CC, Drazen JC, Mayor DJ, Bartlett DH. Microbial community diversity within  
1081 sediments from two geographically separated hadal trenches. *Front Microbiol.* 2019a;10:347.  
1082
- 1083 Peoples LM, Norenberg M, Price D, McGoldrick M, Novotny M, Bochdansky A, Bartlett DH. A  
1084 full-ocean depth rated modular lander and pressure-retaining sampler capable of collecting  
1085 hadal-endemic microbes under in situ conditions. *Deep Sea Res Pt 1.* 2019b;143:50-57.  
1086
- 1087 Pinchuk EG, Hill EA, Geydebrekht OV, De Ingeniis J, Zhang X, Osterman A, Scott JH, Reed  
1088 SB, Romine MF, Konopka AE, Beliaev AS, Fredrickson JK, Reed JL. Constraint-based model of  
1089 *Shewanella oneidensis* MR-1 metabolism: A tool for data analysis and hypothesis generation.  
1090 *PLoS One.* 2010;6:e1000822.  
1091
- 1092 Planet PJ, Kachlany SC, Fine DH, DeSalle R, Figurski DH. The widespread colonization island  
1093 of *Actinobacillus actinomycetemcomitans*. *Nature Genetics.* 2003;34:193-198.  
1094
- 1095 Pradel N, Ji B, Gimenez G, Talla E, Lenoble P, Garel M, Tamburini C, Fourquet P, Lebrun R,  
1096 Bertin P, Denis Y, Pophillat M, Barbe V, Ollivier B, Dolla A. The first genomic and proteomic  
1097 characterization of a deep-sea sulfate reducer: Insights into the piezophilic lifestyle of  
1098 *Desulfovibrio piezophilus*. *PLoS One.* 2013;8:e55130.  
1099
- 1100 Pruesse E, Peplies J, Glöckner FO. SINA: Accurate high-throughput multiple sequence  
1101 alignment of ribosomal RNA genes. *Bioinformatics.* 2012;28:1823-1829.  
1102

- 1103 Pu M, Duriez P, Arazi M, Rowe-Magnus DA. A conserved tad pilus promotes *Vibrio vulnificus*  
1104 oyster colonization. *Environ Microbiol.* 2018;20:828-841.  
1105
- 1106 Qin QL, Li Y, Zhang YJ, Zhou ZM, Zhang WX, Chen XL, Zhang XY, Zhou BC, Wang L,  
1107 Zhang YZ. Comparative genomics reveals a deep-sea sediment-adapted life style of  
1108 *Pseudoalteromonas* sp. SM9913. *ISME J.* 2011;5:274.  
1109
- 1110 Redmond MC, Valentine DL. Natural gas and temperature structured a microbial community  
1111 response to the Deepwater Horizon oil spill. *Proc Nat Acad Sci.* 2012;109:20292-20297.  
1112
- 1113 Ren J, Ahlgren NA, Lu YY, Fuhrman JA, Sun F. VirFinder: a novel k-mer based tool for  
1114 identifying viral sequences from assembled metagenomic data. *Microbiome.* 2017;5:69.  
1115
- 1116 Roux S, Enault F, Hurwitz BL, Sullivan MB. VirSorter: mining viral signal from microbial  
1117 genomic data. *PeerJ.* 2015;3:e985.  
1118
- 1119 Showalter GM, Deming JW. Low-temperature chemotaxis, halotaxis and chemohalotaxis by the  
1120 psychrophilic marine bacterium *Colwellia psychrerythraea* 34H. *Environ Microbiol Rep.*  
1121 2018;10:92-101.  
1122
- 1123 Simonato F, Campanaro S, Lauro FM, Vezzi A, D'Angelo M, Vitulo N, Valle G, Bartlett DH.  
1124 Piezophilic adaptation: a genomic point of view. *Journal of Biotechnology.* 2006;126:11-25.  
1125
- 1126 Simpson RK, Gilmour A. The effect of high hydrostatic pressure on the activity of intracellular  
1127 enzymes of *Listeria monocytogenes*. *Letters in Applied Microbiology.* 1997;25:48-53.  
1128
- 1129 Smedile F, Messina E, La Cono V, Tsoy O, Monticelli LS, Borghini M, Giuliano L, Golyshin  
1130 PN, Mushegian A, Yakimov MM. Metagenomic analysis of hadopelagic microbial assemblages  
1131 thriving at the deepest part of the Mediterranean Sea, Matapan-Vavilov Deep. *Environ*  
1132 *Microbiol.* 2013;15:167-182.  
1133
- 1134 Somero GN. Protein adaptations to temperature and pressure: complementary roles of adaptive  
1135 changes in amino acid sequence and internal milieu. *Comparative Biochemistry and Physiology*  
1136 *Part B: Biochemistry and Molecular Biology.* 2003;136:577-591.  
1137
- 1138 Stamatakis A. RAxML version 8: a tool for phylogenetic analysis and post-analysis of large  
1139 phylogenies. *Bioinformatics.* 2014;30:1312-1313.  
1140
- 1141 Sutton GG, White O, Adams MD, Kerlavage AR. TIGR Assembler: A new tool for assembling  
1142 large shotgun sequencing projects. *Genome Science and Technology.* 1995;1:9-19.  
1143
- 1144 Somero GN. Adaptations to high hydrostatic pressure. *Annual Review of Physiology.*  
1145 1992;1:557-577.  
1146
- 1147 Swan BK, Martinez-Garcia M, Preston CM, Sczyrba A, Woyke T, Lamy D, Reinthaler T,  
1148 Poulton NJ, Masland EDP, Gomez ML, Sieracki ME, DeLong EF, Herndl GJ, Stepanauskas R.



- 1149 Potential for chemolithoautotrophy among ubiquitous bacteria lineages in the dark ocean.  
1150 Science. 2011;333:1296-1300.  
1151
- 1152 Swan BK, Chaffin MD, Martinez-Garcia M, Morrison HG, Field EK, Poulton NJ, Masland EDP,  
1153 Harris CC, Sczyrba A, Chain PSG, Koren S, Woyke T, Stepanauskas R. Genomic and metabolic  
1154 diversity of Marine Group I Thaumarchaeota in the mesopelagic of two subtropical gyres. PLoS  
1155 One. 2014;9:e95380.  
1156
- 1157 Tabor PS, Deming JW, Ohwada K, Colwell RR. Activity and growth of microbial populations in  
1158 pressurized deep-sea sediment and animal gut samples. Appl Environ Microbiol. 1982;44:413-  
1159 422.  
1160
- 1161 Tamegai H, Nishikawa S, Haga M, Bartlett DH. The respiratory system of the piezophile  
1162 *Photobacterium profundum* SS9 grown under various pressures. Biosci Biotechnol Biochem.  
1163 2012;76:1506-1510.  
1164
- 1165 Tarn J, Peoples LM, Hardy K, Cameron J, Bartlett DH. Identification of free-living and particle-  
1166 associated microbial communities present in hadal regions of the Mariana Trench. Front  
1167 Microbiol. 2016;7:665.  
1168
- 1169 Techtmann SM, Fitzgerald KS, Stelling SC, Joyner DC, Uttukar SM, Harris AP, Alshibli NK,  
1170 Brown SD, Hazen TC. Front Environ Sci. 2016;4:33.  
1171
- 1172 Thrash JC, Temperton B, Swan BK, Landry ZC, Woyke T, DeLong EF, Stepanauskas R,  
1173 Giovannoni SJ. Single-cell enabled comparative genomics of a deep ocean SAR11 bathytype.  
1174 ISME J. 2014;8:1440-1451.  
1175
- 1176 Tomich M, Planet PJ, Figurski DH. The tad locus: postcards from the widespread colonization  
1177 island. Nat Rev Microbiol. 2007;5:363-375.  
1178
- 1179 Tully BJ, Wheat CG, Glazer BT, Huber JA. A dynamic microbial community with high  
1180 functional redundancy inhabits the cold, oxic seafloor aquifer. ISME J. 2018;12:1-16.  
1181
- 1182 Usui K, Hiraki T, Kawamoto J, Kurihara T, Nogi Y, Kato C, Abe F. Eicosapentaenoic acid plays  
1183 a role in stabilizing dynamic membrane structure in the deep-sea piezophile *Shewanella*  
1184 *violacea*: A study employing high-pressure time-resolved fluorescence anisotropy measurement.  
1185 Biochimica et Biophysica Acta. 2012;1818:574-583.  
1186
- 1187 Vannier, P, Marteinsson, VT, Fridjonsson, OH, Oger, P, Jebbar, M. Complete genome sequence  
1188 of the hyperthermophilic, pezophilic, heterotrophic, and carboxydrotrophic archaeon  
1189 *Thermococcus barophilus* MP. J. Bacteriol 2011;193: 1481-1482.  
1190
- 1191 Vannier P, Michoud G, Oger P, Marteinsson V, Jebbar M. Genome expression of *Thermococcus*  
1192 *barophilus* and *Thermococcus kodakarensis* in response to different hydrostatic pressure  
1193 conditions. Research in Microbiology. 2015;166:717-725.  
1194

- 1195 Vezzi A, Campanaro S, D'angelo M, Simonato F, Vitulo N, Lauro FM, Cestaro A, Malacrida G,  
1196 Simionati B, Cannata N, Romualdi C, Bartlett DH, Valle G. Life at depth: *Photobacterium*  
1197 *profundum* genome sequence and expression analysis. *Science*. 2005;307:1459-1461.  
1198
- 1199 Wang F, Wang J, Jian H, Zhang B, Li S, Wang F, Zeng X, Gao L, Bartlett DH, Yu J, Hu S, Xiao  
1200 X. Environmental adaptation: genomic analysis of the piezotolerant and psychrotolerant deep-sea  
1201 iron reducing bacterium *Shewanella piezotolerans* WP3. *PLoS One*. 2008;3:e1937.  
1202
- 1203 Wintersinger JA, Wasmuth JD. Kablammo: an interactive, web-based BLAST results visualizer.  
1204 *Bioinformatics*. 2015;31:1305-1306.  
1205
- 1206 Xiong L, Jian H, Zhang Y, Xiao X. The two sets of DMSO respiratory systems of *Shewanella*  
1207 *piezotolerans* WP3 are involved in deep sea environmental adaptation. *Front Microbiol*.  
1208 2016;7:1418.  
1209
- 1210 Yamada M, Nakasone K, Tamegai H, Kato C, Usami R, Horikoshi K. Pressure regulation of  
1211 soluble cytochromes c in a deep-sea piezophilic bacterium, *Shewanella violacea*. *J Bacteriol*.  
1212 2000;182:2945-2952.  
1213
- 1214 Yancey PH. Organic osmolytes as compatible, metabolic and counteracting cryoprotectants in  
1215 high osmolarity and other stresses. *J Experiment Biol*. 2005;208:2819-2830.  
1216
- 1217 Yancey PH, Fyfe-Johnson AL, Kelly RH, Walker VP, Auñón MT. Trimethylamine oxide  
1218 counteracts effects of hydrostatic pressure on proteins of deep-sea teleosts. *J Experimental*  
1219 *Zoology*. 2001;289:172-176.  
1220
- 1221 Yancey PH, Gerrerger ME, Drazen JC, Rowden AA, Jamieson A. Marine fish may be  
1222 biochemically constrained from inhabiting the deepest ocean depths. *Proc Natl Acad Sci*.  
1223 2014;111:4461-4465.  
1224
- 1225 Yano Y, Nakayama A, Ishihara K, Saito H. Adaptive changes in membrane lipids of barophilic  
1226 bacteria in response to changes in growth pressure. *Appl Environ Microbiol*. 1998;64:479-485.  
1227
- 1228 Yayanos AA. Evolutional and ecological implications of the properties of deep-sea barophilic  
1229 bacteria. *Proc Natl Acad Sci*. 1986;83:9542-9546.  
1230
- 1231 Yayanos AA, Dietz AS, Van Boxtel R. Obligately barophilic bacterium from the Mariana  
1232 Trench. *Proc Natl Acad Sci*. 1981;78:5212-5215.  
1233
- 1234 Yin Y, Mao X, Yang J, Chen X, Mao F, Xu Y. dbCAN: a web resource for automated  
1235 carbohydrate-active enzyme annotation. *Nucl Acids Res*. 2012;40:W445-W451.  
1236
- 1237 Zhang W, Tian RM, Sun J, Bougouffa S, Ding W, Cai L, Lan Y, Tong H, Li Y, Jamieson AJ,  
1238 Bajic VB, Drazen JC, Bartlett D, Qian PY. Genome reduction in *Psychromonas* species within  
1239 the gut of an amphipod from the ocean's deepest point. *mSystems*. 2018;3:e00009-18.  
1240

1241 Zhang W, Watanabe HK, Ding W, Lan Y, Tian RM, Sun J, Chen C, Cai L, Li Y, Oguri K,  
1242 Toyofuku T, Kitazato H, Drazen JC, Bartlett D, Qian PY. Gut microbial divergence between two  
1243 populations of the hadal amphipod *Hirondellea gigas*. Appl Environ Microbiol.  
1244 2019a;85:e02032-18.

1245  
1246 Zhang WJ, Cui XH, Chen LH, Yang J, Li XG, Zhang C, Barbe V, Mangenot S, Fouteau S,  
1247 Guerin T, Kato C, Wu LF. Complete genome sequence of *Shewanella benthica* DB21MT-2, an  
1248 obligate piezophilic bacterium isolated from the deepest Mariana Trench sediment. Mar Gen.  
1249 2019b;44:52-56.

1250  
1251  
1252  
1253  
1254  
1255  
1256  
1257  
1258  
1259  
1260  
1261  
1262  
1263  
1264  
1265  
1266  
1267  
1268  
1269  
1270  
1271  
1272  
1273  
1274  
1275  
1276  
1277  
1278  
1279  
1280  
1281  
1282  
1283  
1284  
1285  
1286

1287 Table 1. Genome characteristics of strains of *Colwellia* compared in this study.  
1288

| <u>Strain</u>         | <u>Isolation location</u> | <u>Isolation depth</u> | <u>Isolation source</u> | <u>Genome size (Mb)</u> | <u>DNA scaffold count</u> | <u>Completeness</u> | <u>Contamination</u> | <u>GC</u> | <u>Coding region</u> | <u>Predicted genes</u> | <u>Protein coding genes with function prediction</u> |
|-----------------------|---------------------------|------------------------|-------------------------|-------------------------|---------------------------|---------------------|----------------------|-----------|----------------------|------------------------|------------------------------------------------------|
| <u>MTCD1</u>          | Mariana Trench            | 10918 m                | Amphipod                | 4.37                    | 184                       | 100%                | 1.47%                | 39.34%    | 83.68%               | 3895                   | 2826                                                 |
| <u>MT41</u>           | Mariana Trench            | 10476 m                | Amphipod                | 4.34                    | 1                         | 100%                | 0.73%                | 39.40%    | 83.88%               | 4057                   | 2933                                                 |
| <u>TT2012</u>         | Tonga Trench              | 9161 m                 | Sediment                | 4.44                    | 250                       | 99.33%              | 2.61%                | 39.55%    | 83.00%               | 4071                   | 2897                                                 |
| <u>C. pizocophila</u> | Japan Trench              | 6278 m                 | Sediment                | 5.48                    | 38                        | 100%                | 1.01%                | 38.84%    | 83.65%               | 4598                   | 3362                                                 |
| <u>GAB14E</u>         | Great Australian Bight    | 1472 m                 | Water                   | 5.72                    | 77                        | 99.49%              | 0.68%                | 37.97%    | 85.76%               | 4790                   | 3484                                                 |
| <u>ND2E</u>           | Mediterranean Sea         | 495 m                  | Water                   | 5.15                    | 57                        | 100%                | 2.38%                | 38.08%    | 85.73%               | 4479                   | 3379                                                 |
| <u>34H</u>            | Arctic Ocean              | 305 m                  | Sediment                | 5.37                    | 1                         | 100%                | 1.68%                | 38.01%    | 85.81%               | 5066                   | 3233                                                 |

1289  
1290

1291 Table 2. Genes identified in piezophilic *Colwellia* but not the piezosensitive strains and which  
 1292 show a biased presence within other known piezophilic microbes and deep-ocean datasets.  
 1293  
 1294

| IMG Gene ID MT41      | Start MT41 (bp) | End MT41 (bp) | Similar to:                                                                                                                                                           |
|-----------------------|-----------------|---------------|-----------------------------------------------------------------------------------------------------------------------------------------------------------------------|
| 2501712773-2501712774 | 738561          | 741622        | <i>P. hadalis</i> , <i>S. benthica</i> , <i>S. violacea</i> , <i>M. yayanosii</i> , <i>Moritella</i> sp. PE36, Peoples 2018, Hu et al. 2018, Tully et al. 2018        |
| 2501712781            | 748798          | 749364        | <i>S. benthica</i> , Tully et al. 2018, Dombrowski et al. 2018                                                                                                        |
| 2501712785            | 751307          | 751420        | <i>P. hadalis</i> , Peoples 2018                                                                                                                                      |
| 2501713024-2501713025 | 1002524         | 1003568       | <i>M. yayanosii</i> , <i>Moritella</i> sp. PE36, Tully et al. 2018, Dombrowski et al. 2018                                                                            |
| 2501713028-2501713043 | 1004921         | 1020893       | <i>P. hadalis</i> , <i>S. benthica</i> , <i>S. violacea</i> , <i>M. yayanosii</i> , <i>Moritella</i> sp. PE36, Hu et al. 2018, Tully et al. 2018                      |
| 2501713628            | 1635614         | 1636453       | <i>P. hadalis</i> , <i>S. benthica</i> , <i>S. violacea</i> , <i>M. yayanosii</i> , <i>Moritella</i> sp. PE36, piezophilic archaea, Hu et al. 2018, Tully et al. 2018 |
| 2501713976            | 1995082         | 1995321       | <i>S. benthica</i>                                                                                                                                                    |
| 2501714033            | 2052442         | 2052666       | <i>S. benthica</i>                                                                                                                                                    |
| 2501714084            | 2101280         | 2101915       | <i>P. hadalis</i> , <i>S. benthica</i> , <i>S. violacea</i> , <i>M. yayanosii</i> , <i>Moritella</i> sp. PE36, Tully et al. 2018                                      |
| 2501714124-2501714126 | 2137413         | 2141565       | <i>P. hadalis</i> , <i>S. benthica</i> , <i>M. yayanosii</i> , Tully et al. 2018, Dombrowski et al. 2018                                                              |
| 2501714471-2501714485 | 2514635         | 2530350       | <i>S. benthica</i> , <i>S. violacea</i> , Peoples 2018                                                                                                                |
| 2501714619            | 2663589         | 2663918       | <i>S. benthica</i> , Peoples 2018, Tully et al. 2018                                                                                                                  |
| 2501714669            | 2714988         | 2715770       | <i>M. yayanosii</i> , <i>Moritella</i> sp. PE36, SAR324, Peoples 2018, Tully et al. 2018                                                                              |
| 2501715698            | 3869630         | 3871057       | <i>Photobacterium profundum</i> SS9, <i>S. benthica</i> , <i>M. yayanosii</i> , <i>Moritella</i> sp. PE36, Peoples 2018, Tully et al. 2018                            |
| 2501715722            | 3894109         | 3895707       | <i>P. hadalis</i> , Tully et al. 2018                                                                                                                                 |
| 2501715931-2501715932 | 4122279         | 4122819       | <i>S. benthica</i> , <i>M. yayanosii</i>                                                                                                                              |
| 2501716002-2501716003 | 4182966         | 4183371       | <i>S. benthica</i> , <i>M. yayanosii</i> , Tully et al. 2018                                                                                                          |

1295  
 1296  
 1297  
 1298  
 1299  
 1300  
 1301  
 1302  
 1303  
 1304  
 1305  
 1306  
 1307  
 1308  
 1309  
 1310  
 1311  
 1312  
 1313  
 1314  
 1315  
 1316  
 1317  
 1318  
 1319  
 1320  
 1321  
 1322  
 1323  
 1324  
 1325

1326 Figure 1. A; Approximate sample collection locations for the *Colwellia* strains compared in this  
1327 study. B; Whole genome phylogenetic tree and shared average nucleotide identities among the  
1328 seven strains of interest.

1329  
1330 Figure 2. A; Isoelectric point distribution of proteins within piezophilic (blue points) or  
1331 piezosensitive (black) strains, with an average line of fit within each group. B; Isoelectric point  
1332 protein bias within each strain as a function of their growth pressure. C; Asymmetry index values  
1333 indicating preference of amino acids in the piezophiles or *C. psychrerythraea* 34H within  
1334 orthologous proteins present in all strains. D; Specific amino acid substitutions from *C.*  
1335 *psychrerythraea* 34H to the piezophiles within orthologous proteins. The substitutions shown  
1336 were also identified within comparisons between piezophilic and piezosensitive *Shewanella*.

1337  
1338 Figure 3. A; The percent abundance of proteins within each COG category within piezophilic or  
1339 piezosensitive *Colwellia*. B) Specific genomic attributes that were differentially present in  
1340 piezophilic or piezosensitive strains. Present, grey; absent, white.

1341  
1342 Figure 4. A; The location of a d-ala d-ala ligase gene in strains MT41 and TT2012, with  
1343 surrounding genes labeled. B; An amino acid tree of the d-ala-d-ala ligase with sequences  
1344 approximately > 50% similar shown.

1345  
1346 Figure 5. A; The location of alanine dehydrogenase genes in strains MT41 and TT2012, with  
1347 surrounding genes labeled. B; An amino acid tree of the alanine dehydrogenase with sequences  
1348 approximately > 50% similar shown.



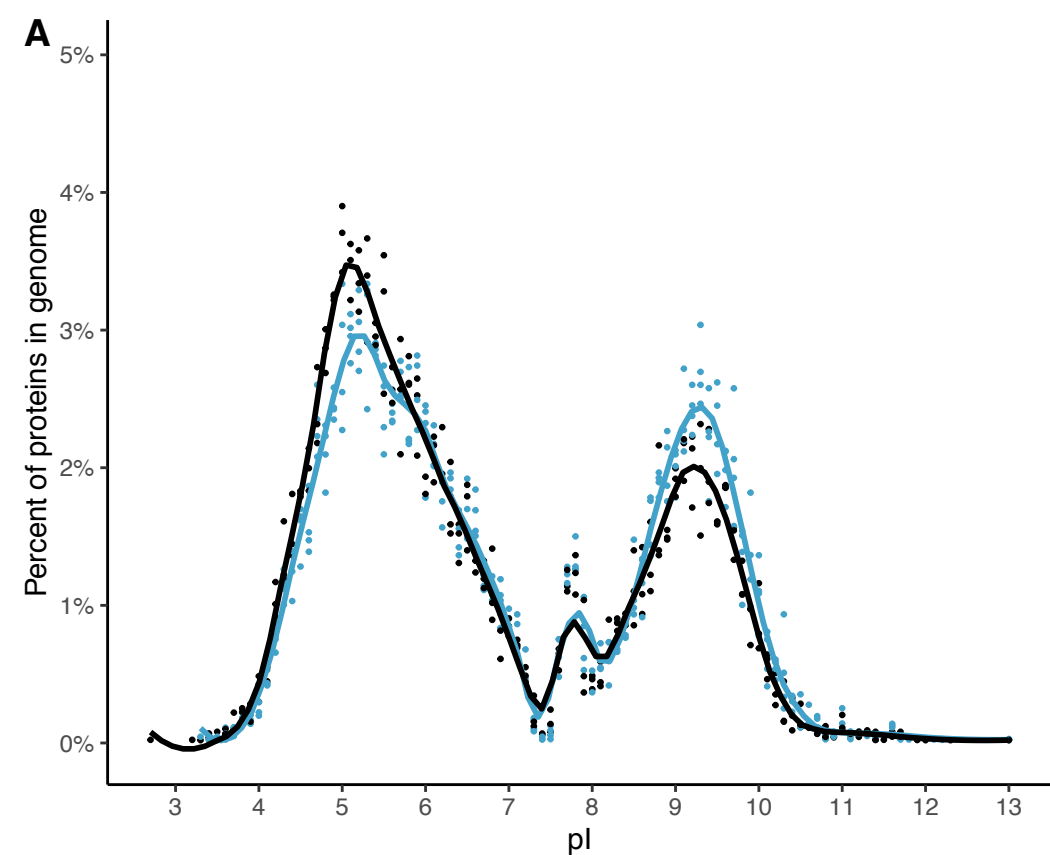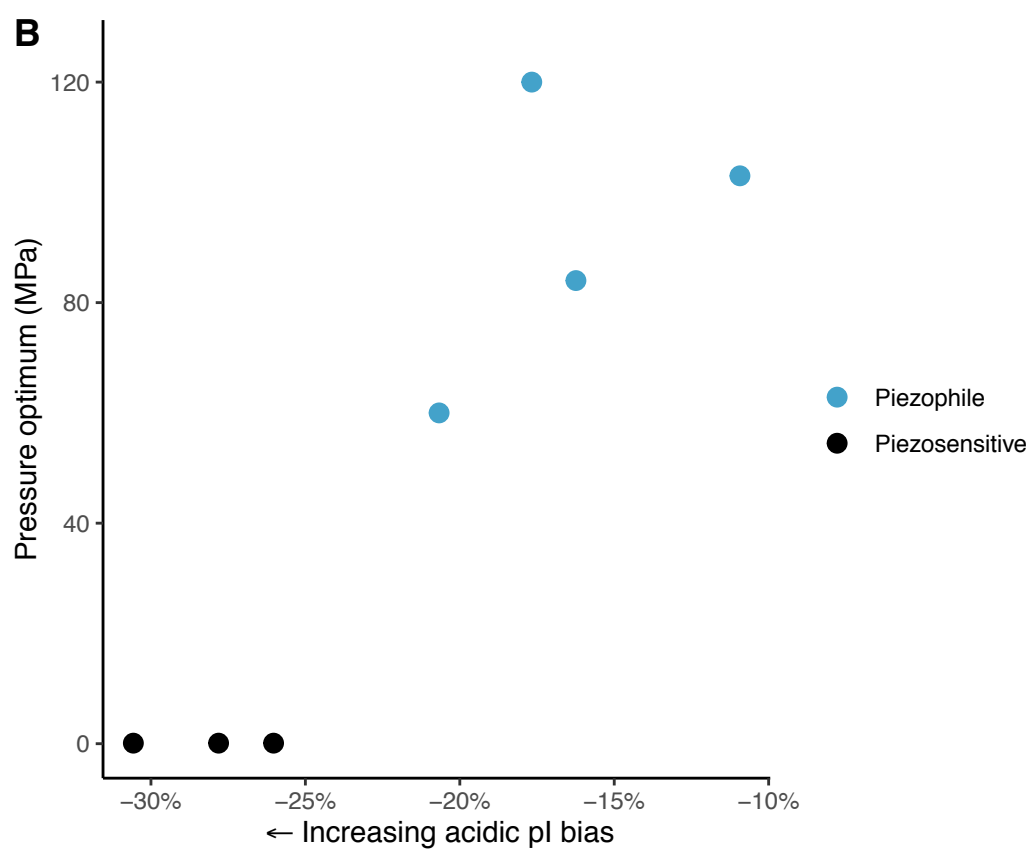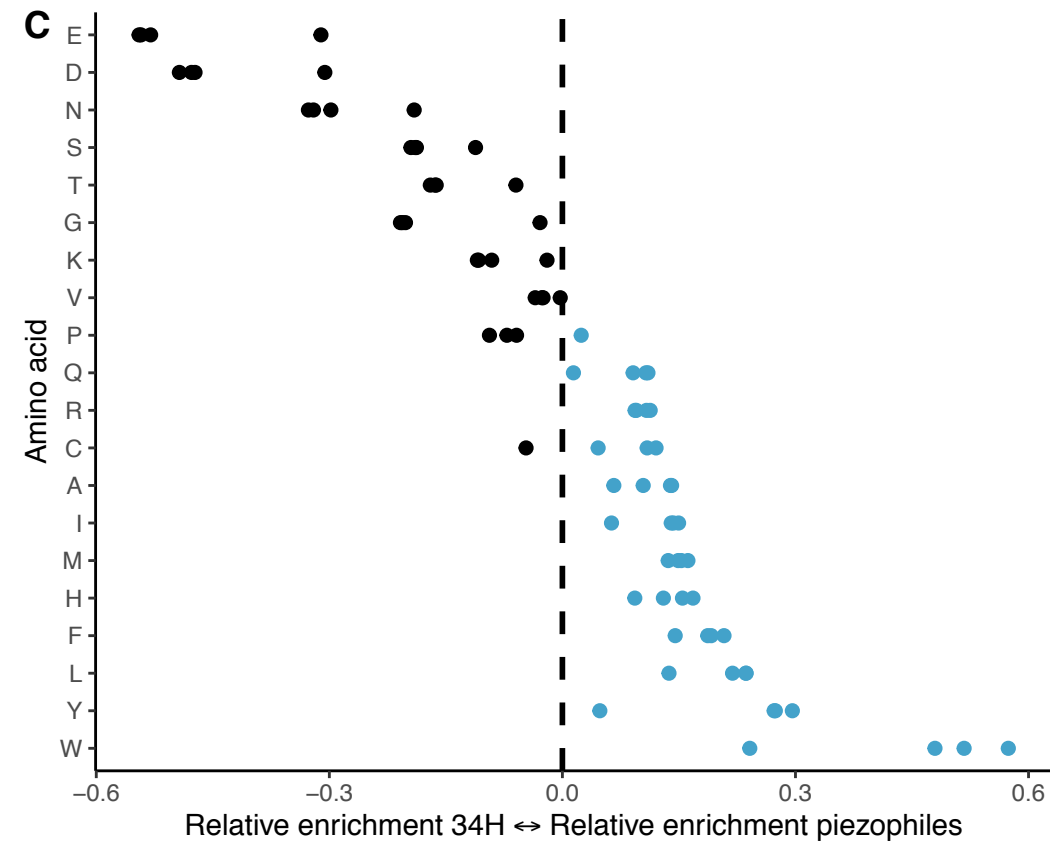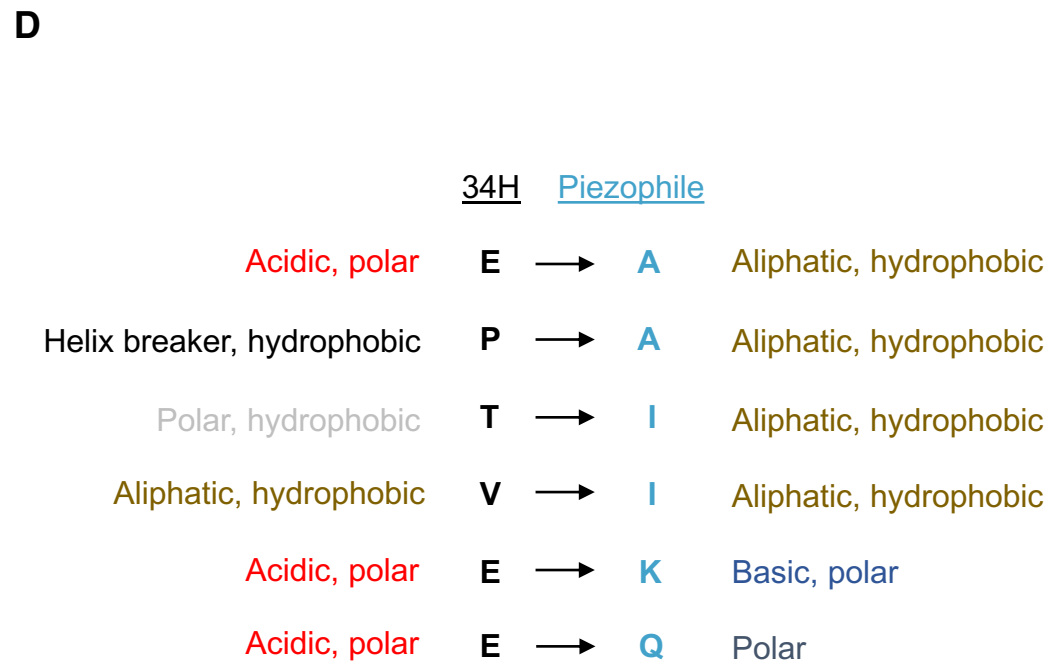



**A**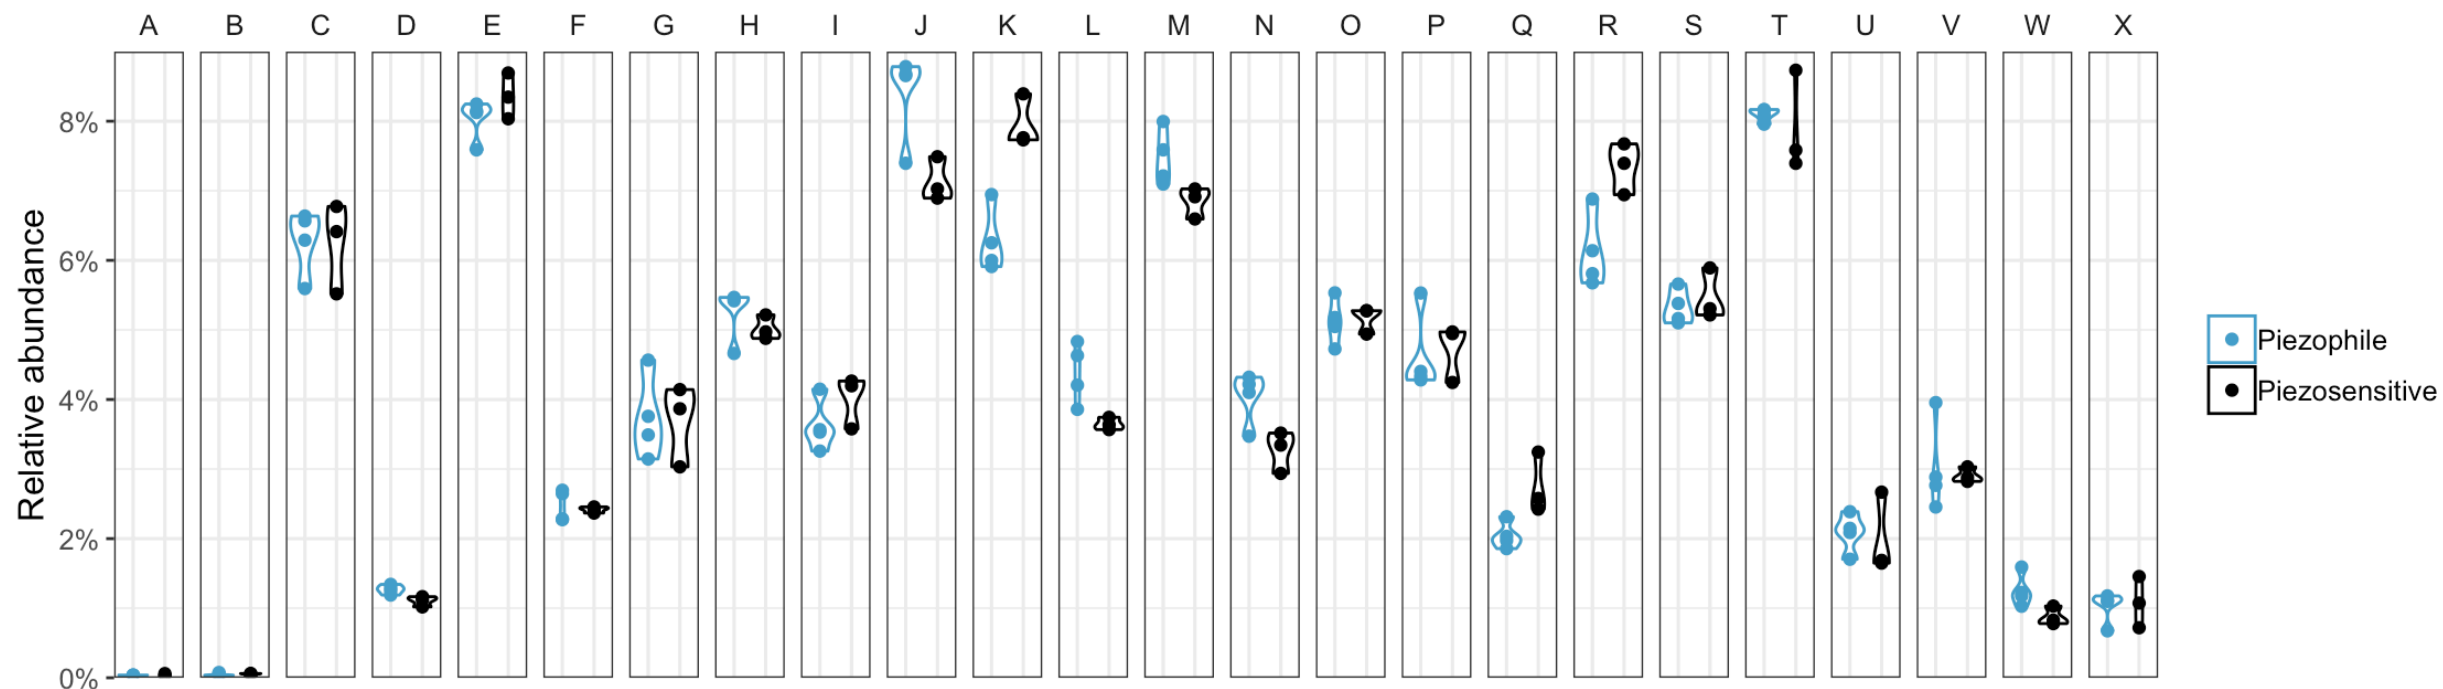**B**

Gene categories for Panel B:

- pfaABCD
- Delta-9-acyl phospholipid desaturase
- Fatty acid cis/trans isomerase
- Glycosyltransferases
- araC, lysP families
- Flagellar operon
- Type II secretion system
- Type IV pilus
- Tad operon
- nqrABCDEF
- nuoABCEFGHIJKLMN
- torCAD
- Alanine dehydrogenase
- Archaeal methyltransferase
- D-alanine-D-alanine ligase
- Chitinase
- Multicopper oxidase
- phrB
- Phage genes
- Toxin/antitoxin genes
- Transposase genes

|                      |  |  |    |    |  |  |  |  |  |  |   |  |   |  |  |    |    |    |
|----------------------|--|--|----|----|--|--|--|--|--|--|---|--|---|--|--|----|----|----|
| MT41                 |  |  | 24 | 22 |  |  |  |  |  |  | 2 |  | 2 |  |  | 35 | 30 | 66 |
| MTCD1                |  |  | 21 | 23 |  |  |  |  |  |  | 2 |  | 2 |  |  | 24 | 33 | 57 |
| TT2012               |  |  | 24 | 22 |  |  |  |  |  |  | 2 |  | 2 |  |  | 25 | 24 | 61 |
| <i>C. piezophila</i> |  |  | 16 | 41 |  |  |  |  |  |  | 2 |  | 2 |  |  | 26 | 25 | 12 |
| GAB14E               |  |  | 15 | 60 |  |  |  |  |  |  | 1 |  | 1 |  |  | 30 | 18 | 39 |
| ND2E                 |  |  | 12 | 70 |  |  |  |  |  |  | 1 |  | 1 |  |  | 36 | 12 | 21 |
| 34H                  |  |  | 11 | 92 |  |  |  |  |  |  | 1 |  | 1 |  |  | 24 | 9  | 32 |

**A**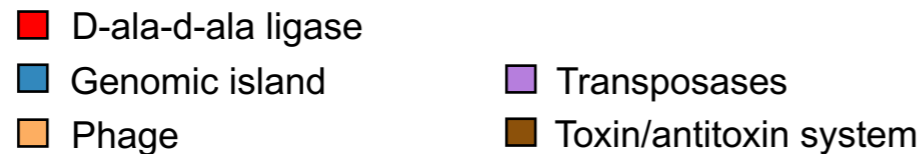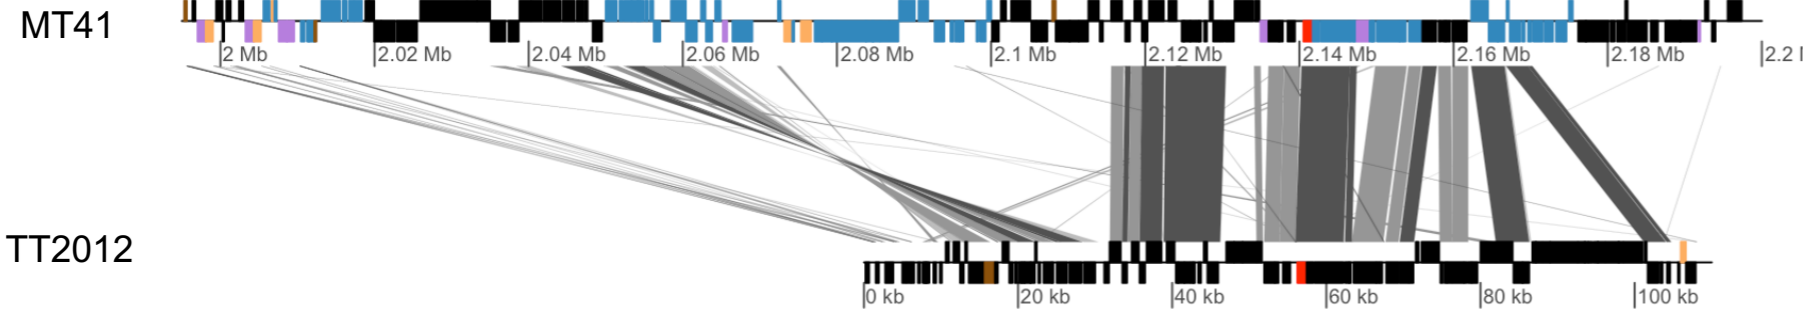**B**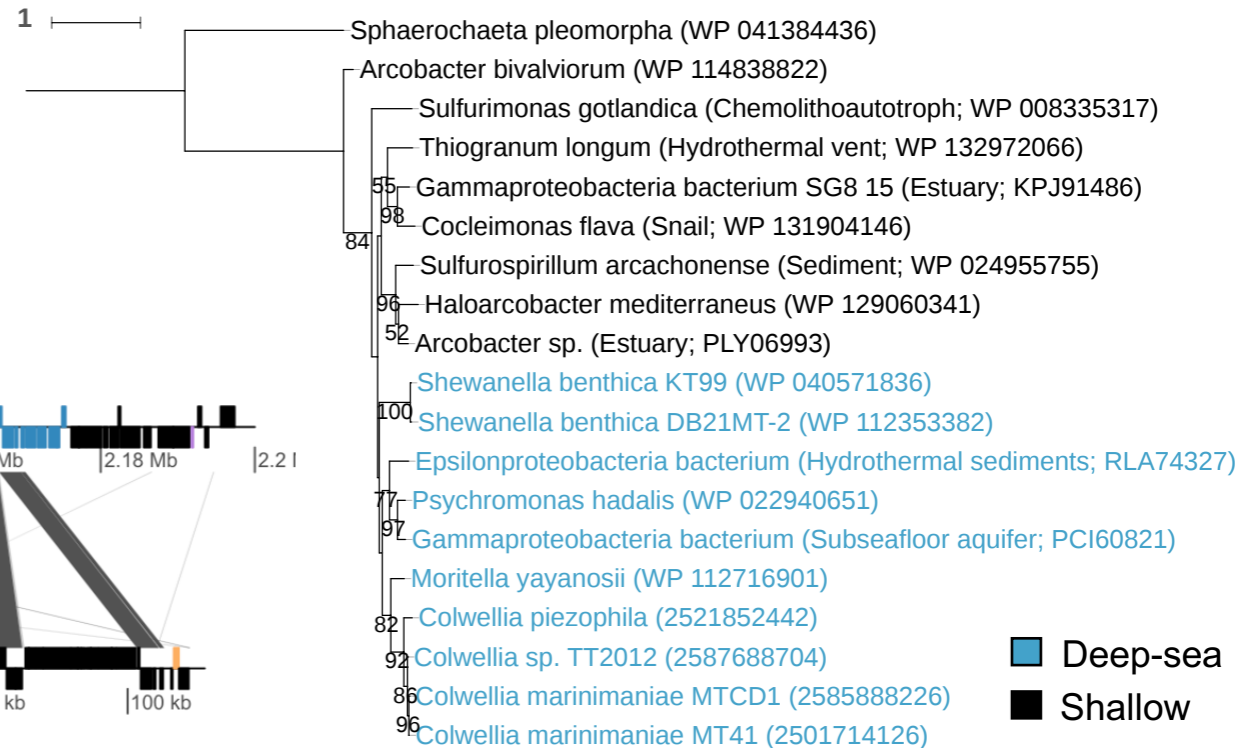

**A**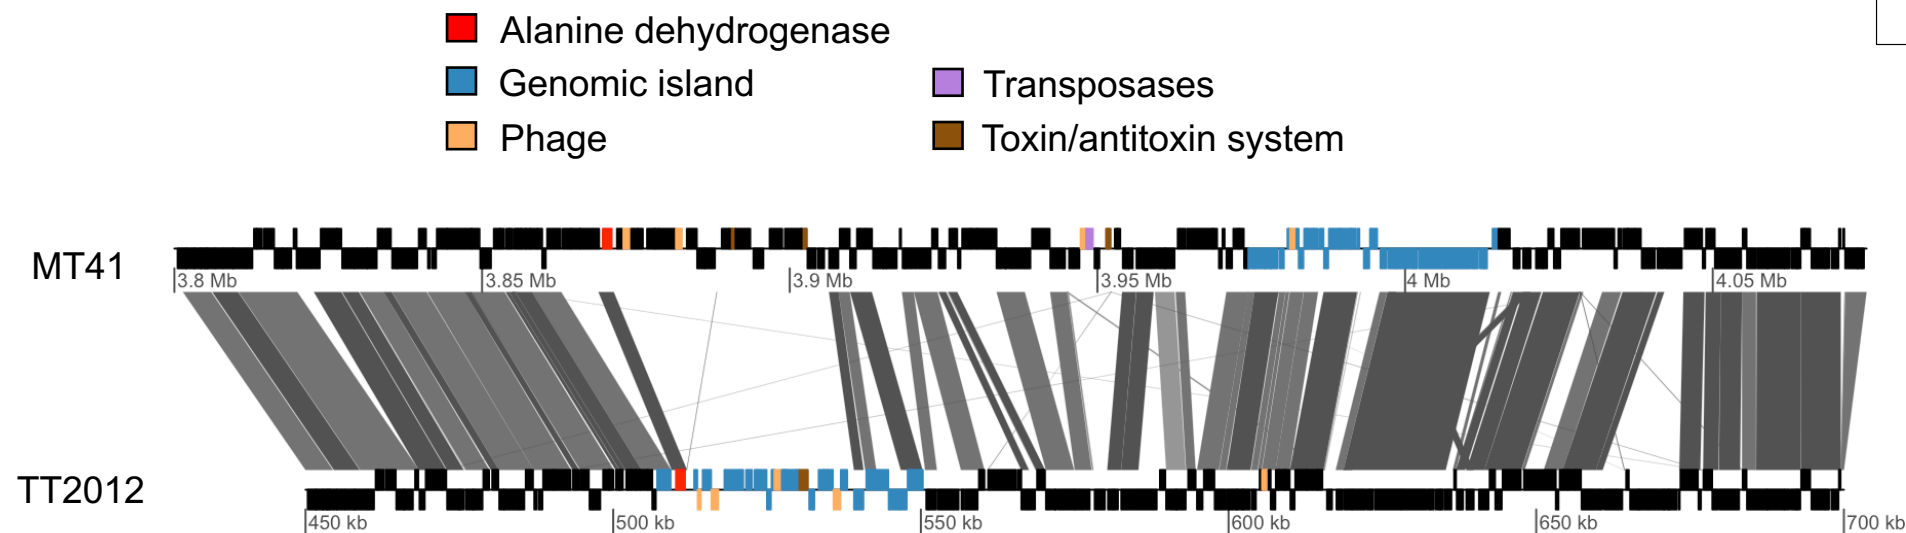**B**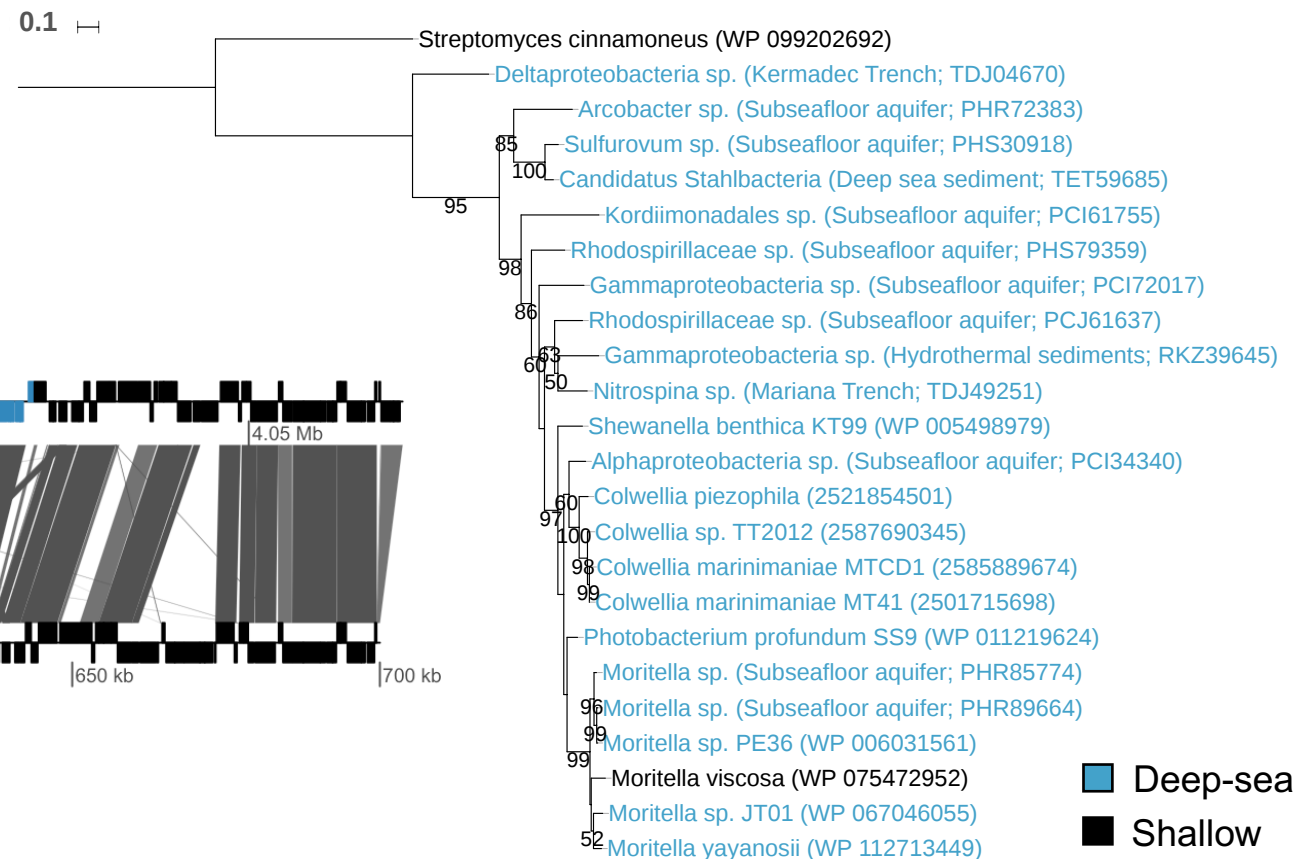

Source: https://www.biorxiv.org/content/10.1101/2020.03.15.992594v1.full.pdf
